# Supplementary material for: Increased RNA editing in maternal immune activation model of neurodevelopmental disease
Source: PubMed Central journal article supplement (PMC7567798; doi:10.1038/s41467-020-19048-6), 2020-10-16
Supplement: 41467_2020_19048_MOESM1_ESM.pdf [file 41467_2020_19048_MOESM1_ESM.pdf]

# **Supplementary Information**

## **Increased RNA Editing in Maternal Immune Activation Model of Neurodevelopmental Disease**

Tsivion-Visbord et al.

## Supplementary Figures

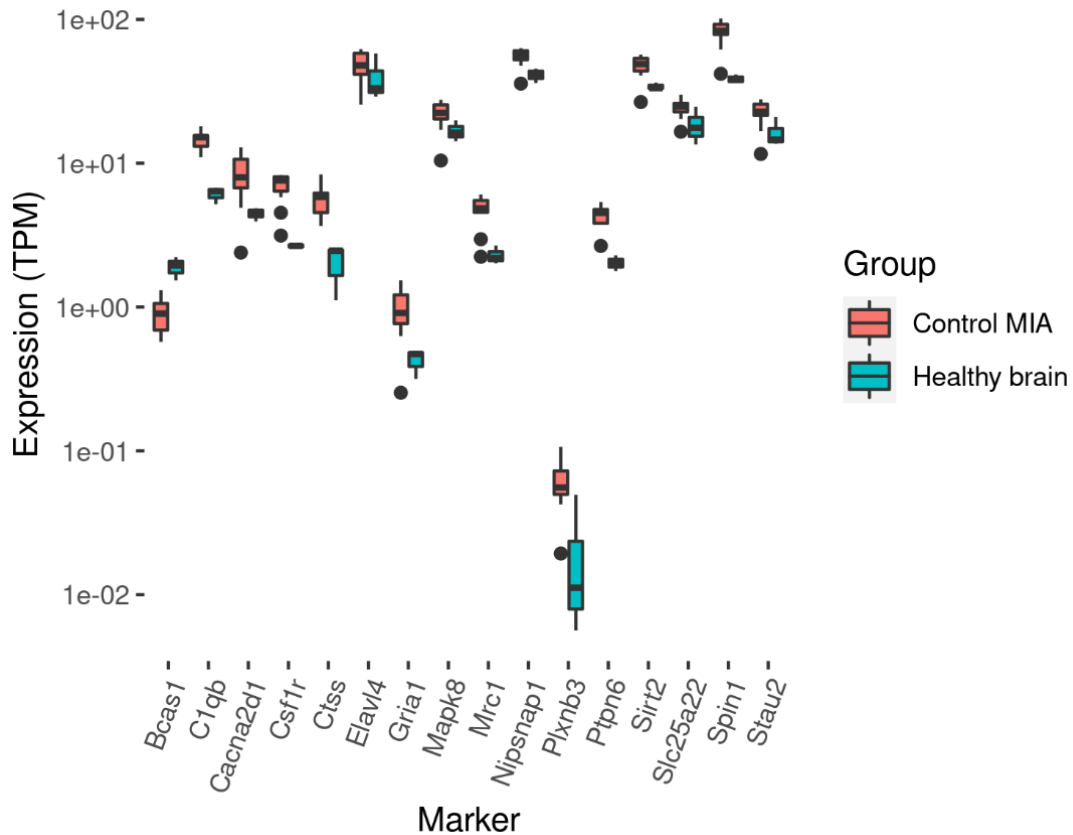

### Supplementary Figure 1

Brain tissue of origin verification. A comparison between the gene expression levels of 16 mouse brain markers (Dai et al. 2019) in control samples from our MIA experiment ( $n = 11$ ), and healthy brain samples ( $n = 3$ ) from a recently published authoritative resource of gene expression across mouse brain development (Cardoso-Moreira et al. ,Nature, 2019). Both groups were sequenced on gestational day 10. Distributions are presented as box-and-whisker plots (center line, median; box limits correspond to the first and third quartiles; whiskers, 1.5 $\times$  interquartile range and points, outliers). Source data are provided as a Source Data file.

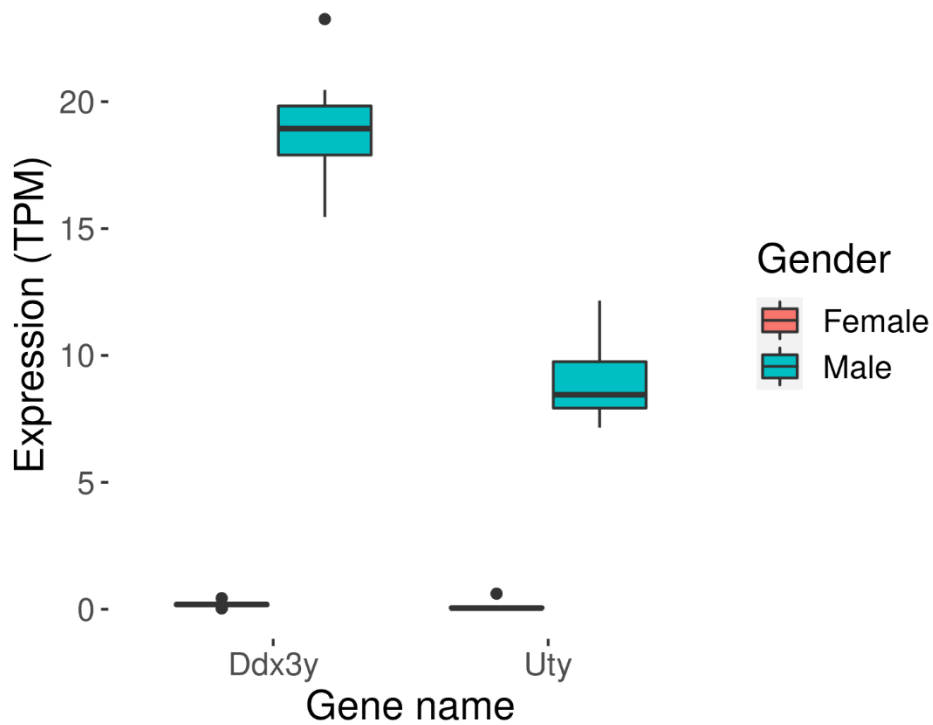

### Supplementary Figure 2

Sex determination of the mice. The sex of each mouse fetus was determined by analyzing the gene expression levels of chromosome Y linked genes DDX3Y and UTY (n=10 for male and n=9 for female). A threshold of expression levels in TPM units < 1 was set to define female mice. Distributions are presented as box-and-whisker plots (center line, median; box limits correspond to the first and third quartiles; whiskers, 1.5x interquartile range and points, outliers). Source data are provided as a Source Data file.

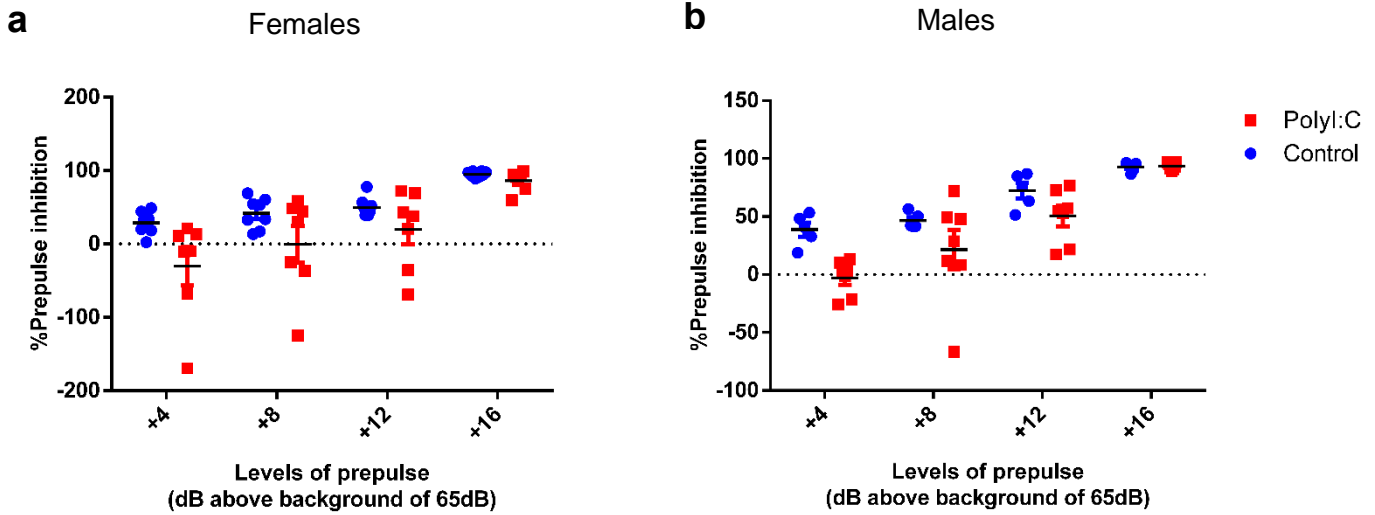

### Supplementary Figure 3

Prepulse inhibition test. PPI data (mean  $\pm$  SEM) shows the percent of prepulse inhibition of the startle response following the presentation of prepulse-plus-pulse acoustic stimuli. Four different prepulse intensities (69, 73, 77 and 81dB) were measured. PolyI:C females (a) showed an almost significant PPI deficiency (n=8 for control, n=7 for PolyI:C, two sided p-value =0.057; obtained from F test with (1,13) degrees of freedom) and Poly I:C males (b) showed a significant deficiency (n=5 for control, n=7 for PolyI:C, two sided p-value =0.01; obtained from F test with (1,10) degrees of freedom). All values are means  $\pm$  SEM. Source data are provided as a Source Data file.

**a**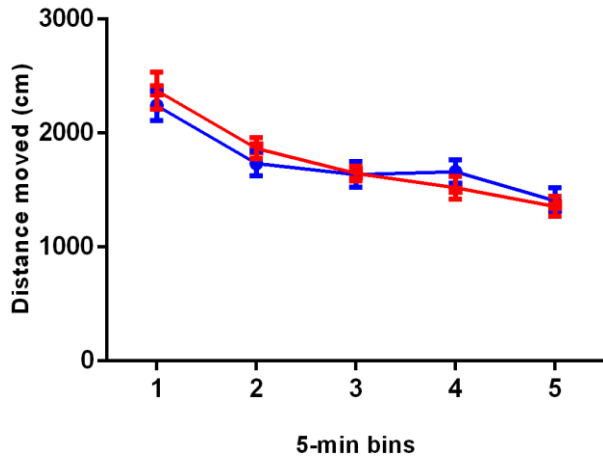**b**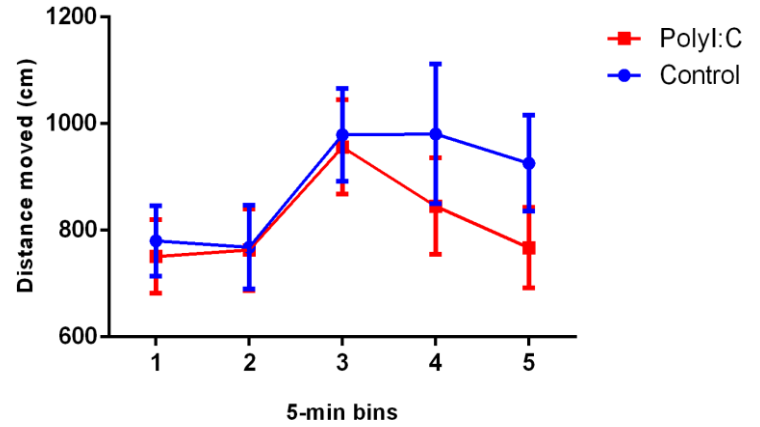

### Supplementary Figure 4

Locomotor response to amphetamine. (a) During 30 min acclimation to the open field arena, PolyI:C treated group showed no difference than control, as all groups had a decline in activity after initial reaction, thereby exhibiting acclimation to the open field arena (n=13 for Control, n=14 for PolyI:C, two sided p-value=0.42; obtained from F test with (1,23) degrees of freedom). (b) Reaction to saline injection likewise showed a lack of difference between the groups (n=13 for Control, n=14 for PolyI:C, two-sided p-value =0.42; obtained from F test with (1,23) degrees of freedom). All values are means  $\pm$  SEM. All values are means  $\pm$  SEM. Source data are provided as a Source Data file.

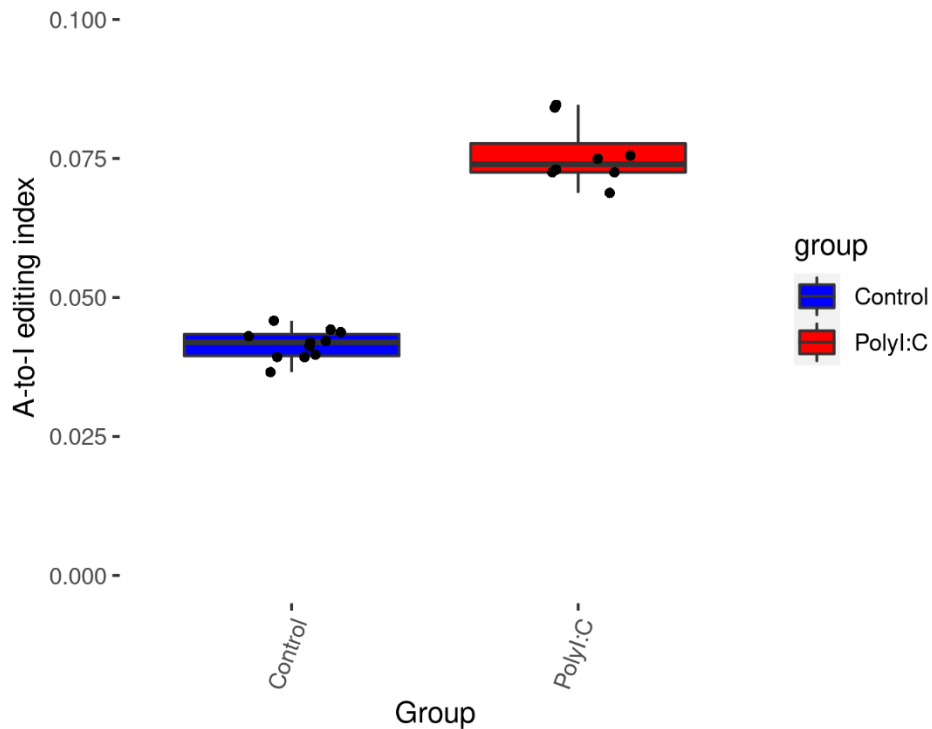

### Supplementary Figure 5

ADAR1 p150 isoform contribution to the global increased editing levels. AEI analysis in 3472 B1 element regions located only within 5' and 3' UTR of PolyI:C (n = 8) and control (n = 11) mice (Two-sided wilcoxon rank-sum test, P. Value = 2.64e-05). Distributions are presented as box-and-whisker plots (center line, median; box limits correspond to the first and third quartiles; whiskers, 1.5x interquartile range and points, outliers). Source data are provided as a Source Data file.

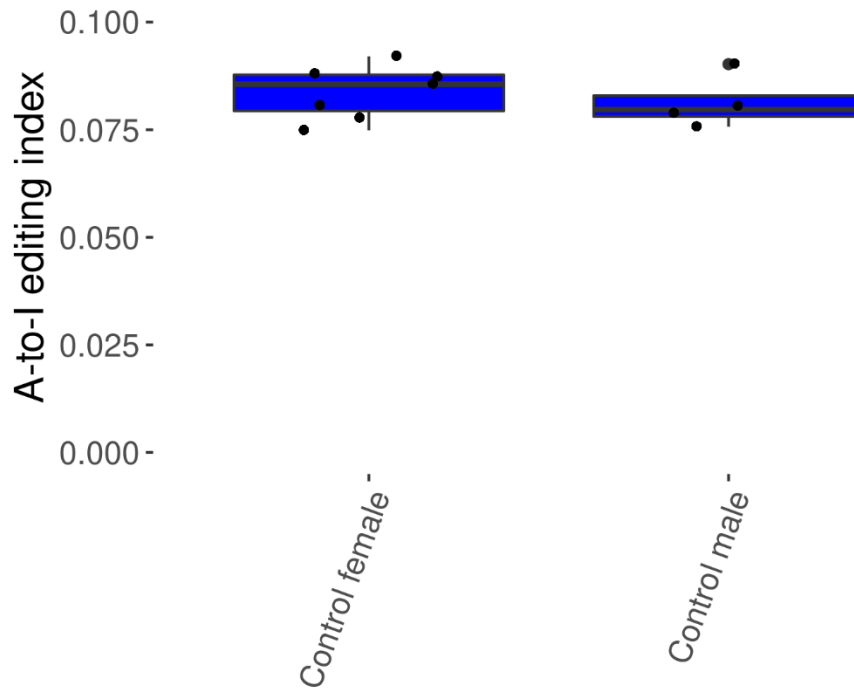

### Supplementary Figure 6

Sex as a differentiating factor of the levels of RNA editing in MIA control mice. AEI of male (n = 4) and female (n = 7) control mice comparison (Two-sided wilcoxon rank-sum test, P. value = 0.65). Distributions are presented as box-and-whisker plots (center line, median; box limits correspond to the first and third quartiles; whiskers, 1.5x interquartile range and points, outliers). Source data are provided as a Source Data file.

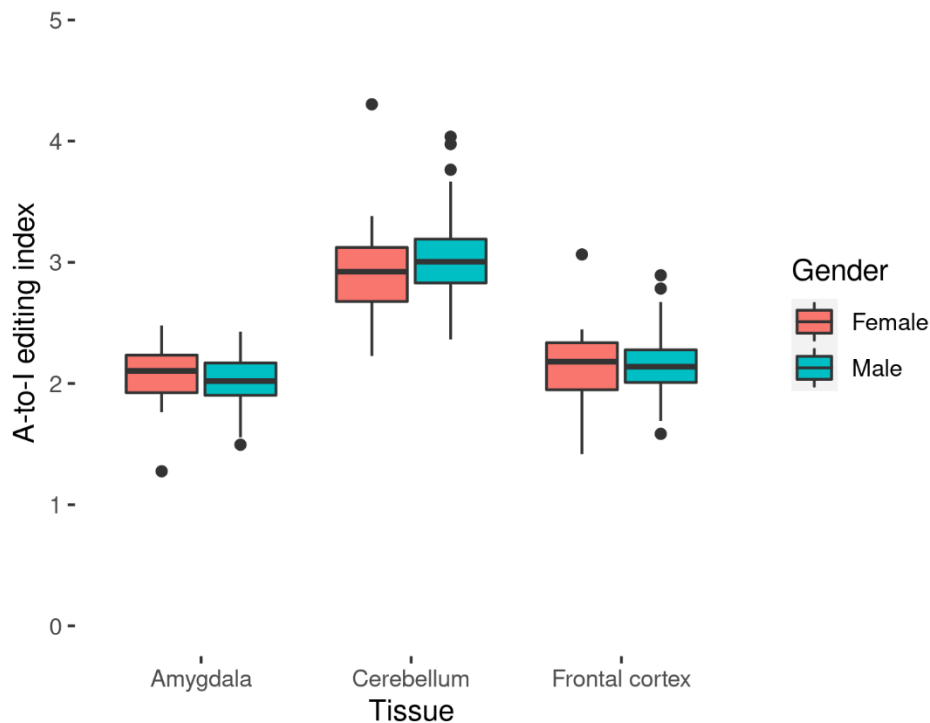

### Supplementary Figure 7

Sex as a differentiating factor of the levels of RNA editing on GTEx healthy brain samples. AEI analysis of RNA-seq brain samples from healthy humans ( $n = 333$ ), downloaded from The Genotype-Tissue Expression (GTEx) portal (<https://gtexportal.org/home/>). We calculated the AEI of brain samples originated from the Cerebellum ( $n = 138$ ; 93 males and 45 females), Frontal Cortex ( $n = 115$ ; 80 males and 35 females) and Amygdala ( $n = 80$ ; 54 males and 26 females) (Two-sided wilcoxon rank-sum test, P. value = Cerebellum: 0.12, Frontal Cortex: 0.74, Amygdala:0.32). Distributions are presented as box-and-whisker plots (center line, median; box limits correspond to the first and third quartiles; whiskers, 1.5 $\times$  interquartile range and points, outliers). Source data are provided as a Source Data file.



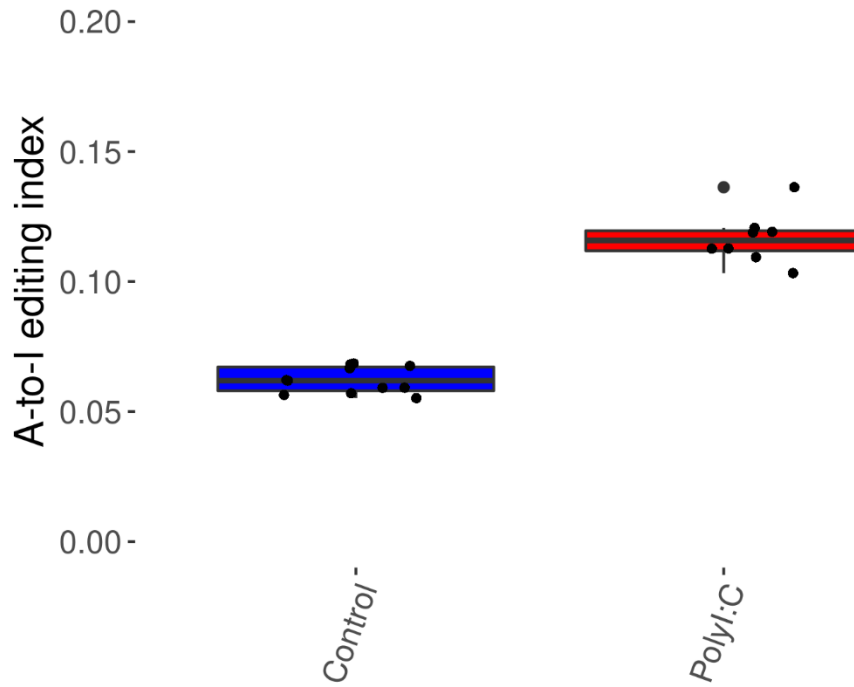

### Supplementary Figure 8

Global editing levels in the original data before the removal of duplicate reads. AEI analysis of PolyI:C (n = 8) and control (n = 11) mice (Two-sided wilcoxon rank-sum test, p. value = 2.6e-05). Distributions are presented as box-and-whisker plots (center line, median; box limits correspond to the first and third quartiles; whiskers, 1.5x interquartile range and points, outliers). Source data are provided as a Source Data file.

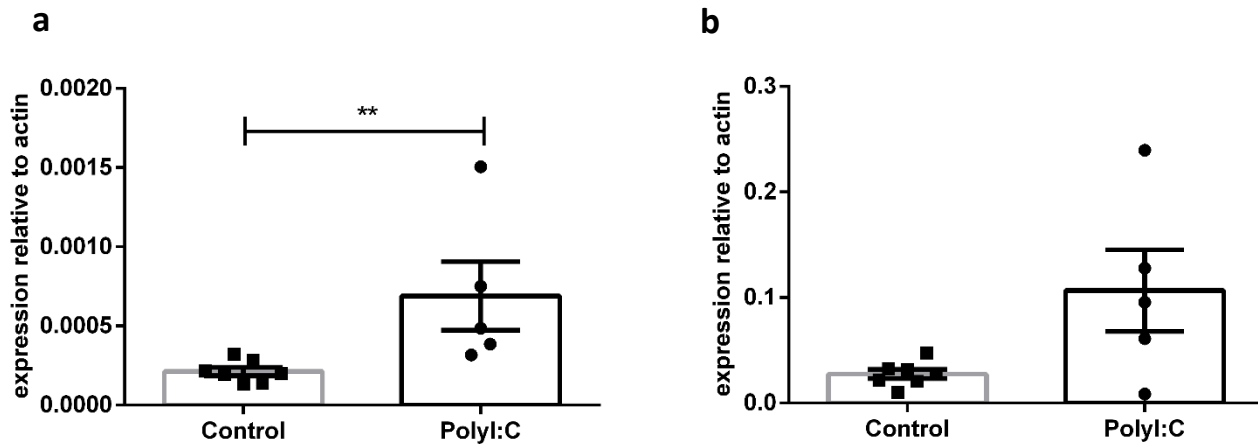

### Supplementary Figure 9

mRNA expression of ADAR1 isoforms as detected by qRT-PCR, in mice whose mothers were exposed to PolyI:C and in control mice. PolyI:C injection of the pregnant mice stimulates ADAR1-p150 (a) and ADAR1-p110 (b) expression in the brains of the fetuses. Pregnant mice were injected intravenously with PolyI:C (5mg/kg), and were killed 24 hours after the treatment, at which point the fetus's heads were obtained. mRNA expression of indicated genes was measured with the SYBR Green real-time PCR using their specific primers. Bars represent mean $\pm$ SEM. Values of fold mRNA expression of ADAR1-p150 and ADAR1-p110 (n=7 for control, n=5 for PolyI:C). Statistical significance of the differences between the groups was assessed with the Mann-Whitney test: \*\*P<0.01. \*\*P<0.01. Source data are provided as a Source Data file.

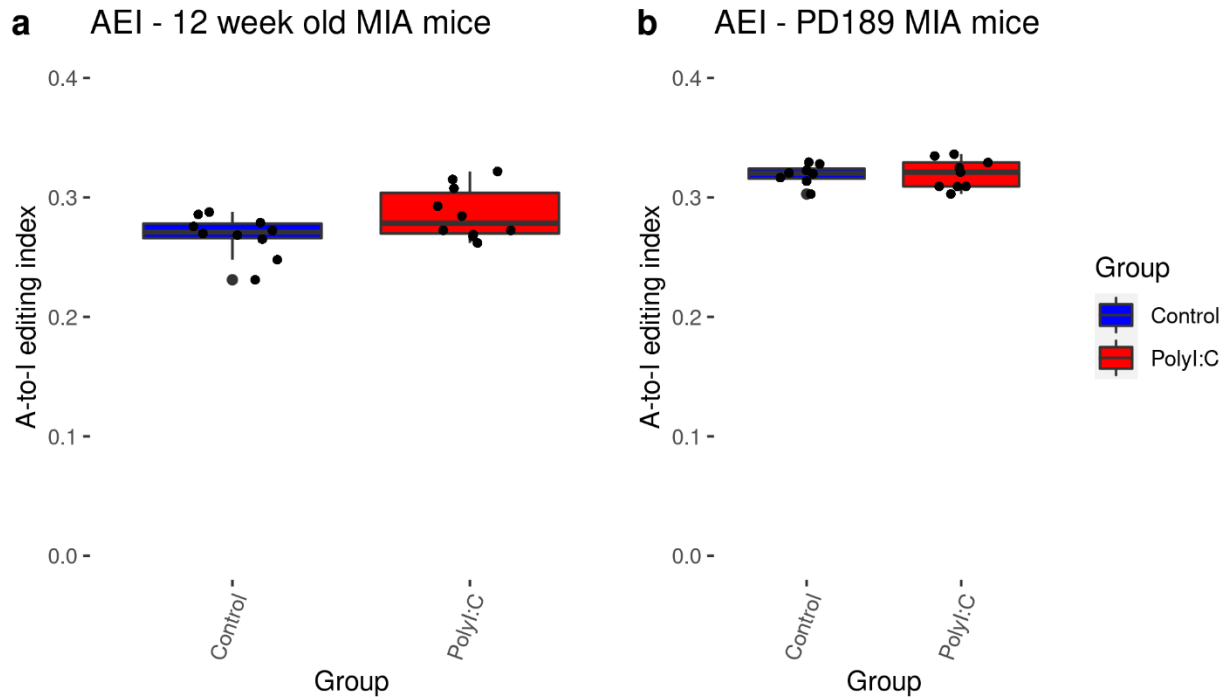

### Supplementary Figure 10

Global editing analysis on older PolyI:C and control mice. (a) AEI of frontal cortex samples from mice subjected to MIA treatment at GD12.5 and sequenced at PD189 (Control = 8, PolyI:C = 9) and (b) AEI of amygdala samples from mice subjected to MIA treatment at GD9 and sequenced at 12 weeks of age (Control = 10, PolyI:C = 10). All distributions are presented as box-and-whisker plots (center line, median; box limits correspond to the first and third quartiles; whiskers, 1.5x interquartile range and points, outliers). Source data are provided as a Source Data file.

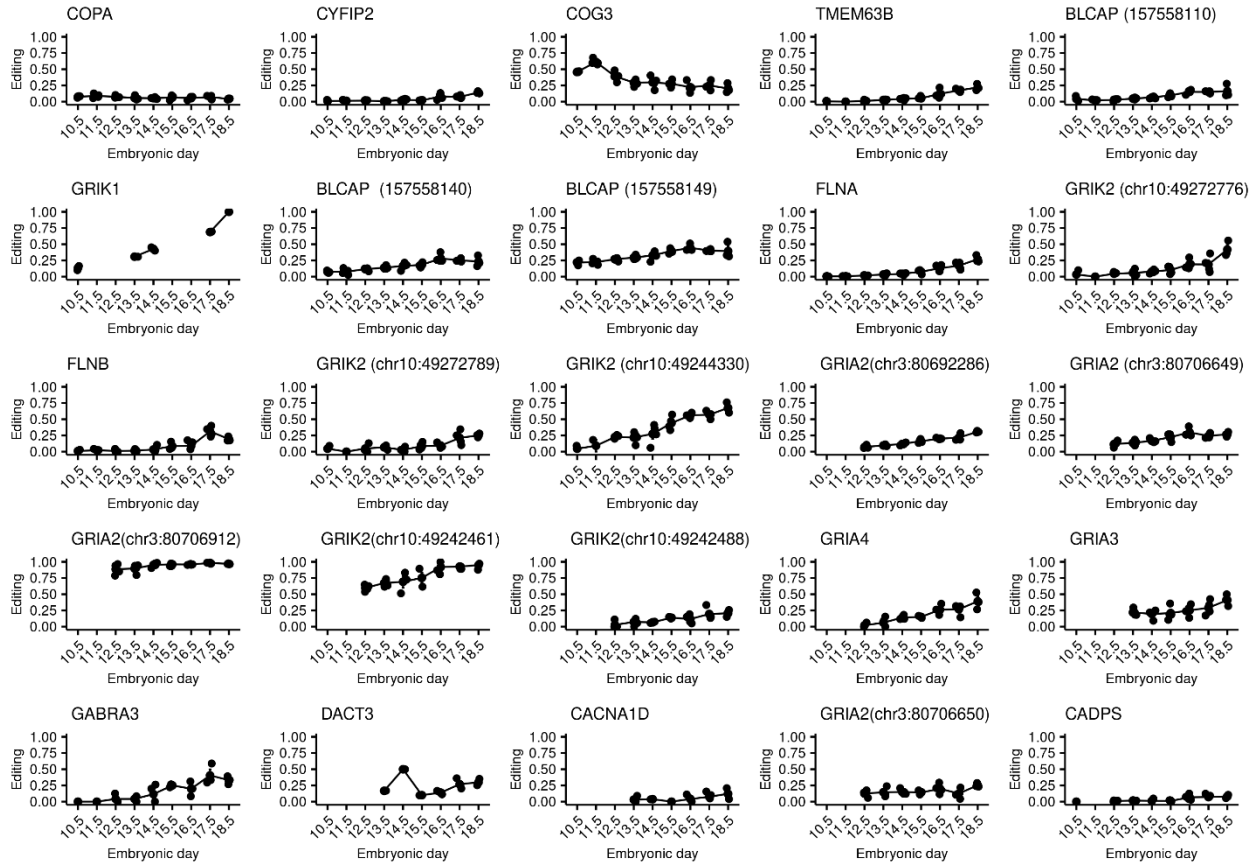

### Supplementary Figure 11

Typical level of variations in RNA editing analysis in specific coding sites during normal development. We analyzed the editing levels of fetal mouse brain samples at every developmental day, from embryonic day 10 through 18 (n = 4 for days 11.5 to 17.5, n = 3 for days 10.5 and 18.5). The results were used to track the changes in A-to-I RNA editing levels in conserved coding sites. Most of the analyzed sites exhibited a general trend of elevation in editing levels as development progressed. Source data are provided as a Source Data file.

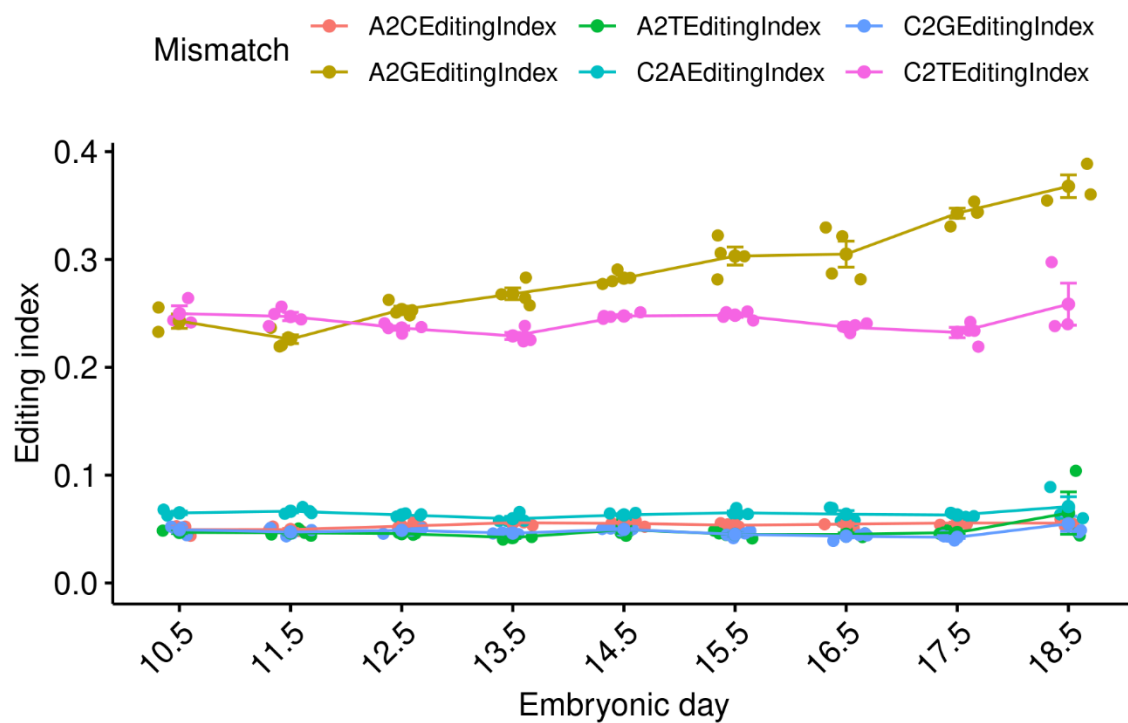

### Supplementary Figure 12

Typical level of variations analysis in global RNA editing levels during normal development. We analyzed the AEI of fetal mouse brain at every developmental day, from embryonic day 10 through 18 (n = 4 for days 11.5 to 17.5, n = 3 for days 10.5 and 18.5). All values are means  $\pm$  SEM. Source data are provided as a Source Data file.

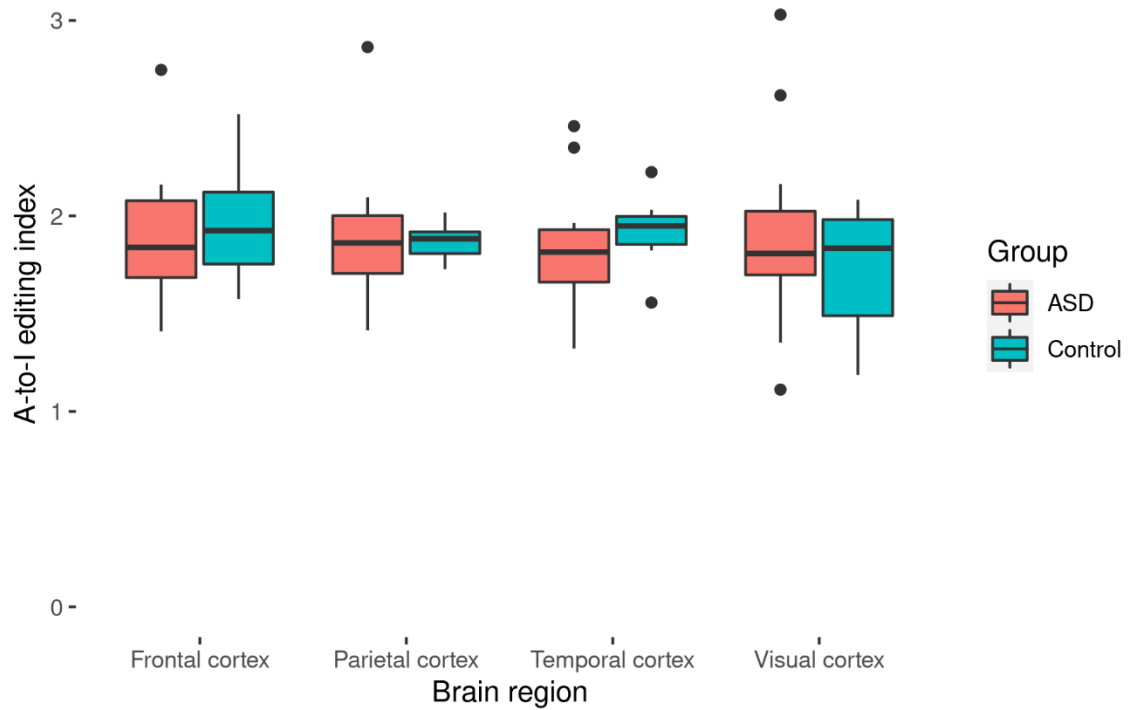

### Supplementary Figure 13

AEI analysis on data sets from various regions of postmortem brain from ASD patients (Two-sided wilcoxon rank-sum test, Frontal cortex: Control = 14, ASD = 7, P. value = 0.68; Parietal cortex: Control = 12, ASD = 8, P. value = 0.43; Temporal cortex: Control = 7, ASD = 11, P. value = 0.68; Visual cortex: Control = 8, ASD = 15, P. value = 0.97). Distributions are presented as box-and-whisker plots (center line, median; box limits correspond to the first and third quartiles; whiskers, 1.5x interquartile range and points, outliers). Source data are provided as a Source Data file.

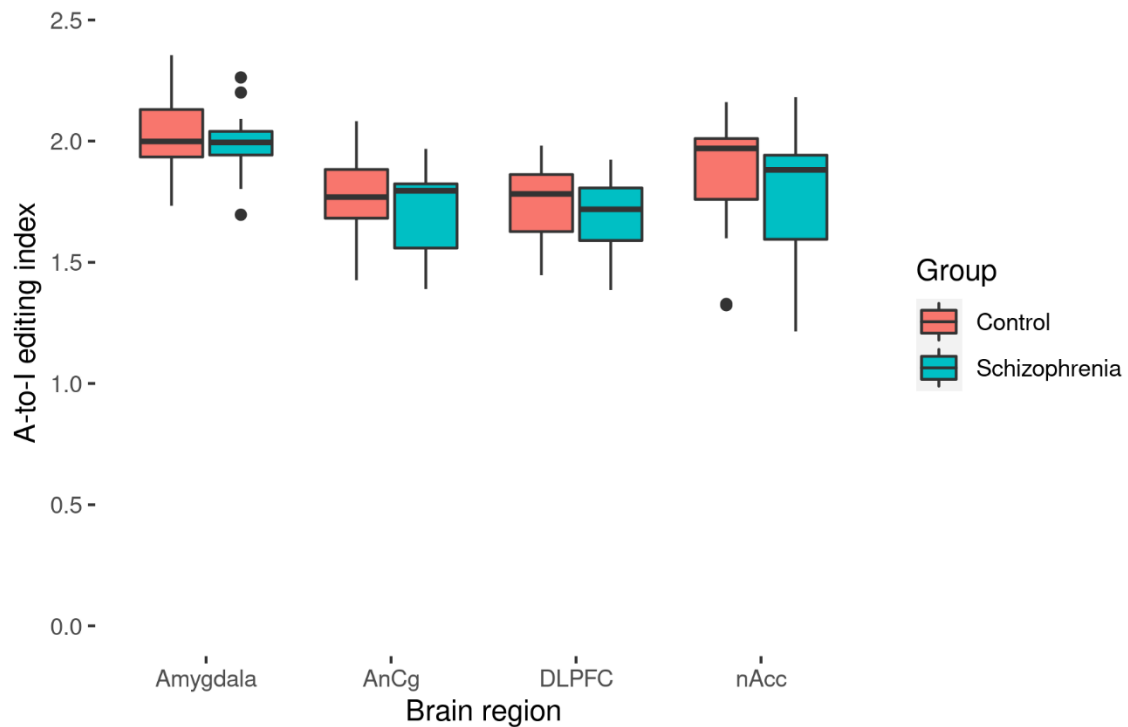

### Supplementary Figure 14

AEI analysis on data sets from various of postmortem brain regions from schizophrenia patients (Two-sided wilcoxon rank-sum test, Amygdala: Control = 24, Schizophrenia = 22, P. value = 0.81; Anterior cingulate cortex (AnCg): Control = 30, Schizophrenia = 28, P. value = 0.41; Nucleus accumbens (nAcc): Control = 27, Schizophrenia = 27, P. value = 0.21; Dorsolateral prefrontal cortex (DLPFC): Control = 30, Schizophrenia = 29, P. value = 0.08). Distributions are presented as box-and-whisker plots (center line, median; box limits correspond to the first and third quartiles; whiskers, 1.5x interquartile range and points, outliers). Source data are provided as a Source Data file.

**Supplementary Table 1. Sex classification for each fetus sample**

| <u>Sample name</u> | <u>Sex</u> |
|--------------------|------------|
| Con-A1_S17         | Female     |
| Con-A2_S12         | Male       |
| Con-A3_S19         | Male       |
| Con-B1_S11         | Male       |
| Con-B2_S8          | Female     |
| Con-B3_S13         | Female     |
| Con-B4_S3          | Female     |
| Con-C1_S7          | Male       |
| Con-C2_S6          | Female     |
| Con-C3_S10         | Female     |
| Con-C4_S2          | Female     |
| PIC-A1_S20         | Male       |
| PIC-A1_S9          | Male       |
| PIC-A2_S16         | Female     |
| PIC-A4_S18         | Male       |
| PIC-C1_S15         | Male       |
| PIC-C2_S14         | Female     |
| PIC-C3_S5          | Male       |
| PIC-C4_S4          | Male       |



**Supplementary Table 2. RNA editing levels in conserved coding sites - deep sequencing analysis.**

| Region | Position | Strand | Gene name | Site     | Control-%editing | PolyI:C-%editing |
|--------|----------|--------|-----------|----------|------------------|------------------|
| chr7   | 16885347 | +      | DACT3     | DACT3    | 19.8             | 60.2             |
| chr3   | 80692286 | -      | GRIA2     | GRIA2_1  | 10.4             | 46.2             |
| chr14  | 75719719 | -      | COG3      | COG3     | 50.5             | 82.5             |
| chr3   | 80706649 | -      | GRIA2     | GRIA2_2  | 0                | 25               |
| chr5   | 77407731 | -      | IGFBP7    | IGFBP7_1 | 16.7             | 40.9             |
| chr2   | 1.58E+08 | -      | BLCAP     | BLCAP_4  | 38.5             | 62.3             |
| chr2   | 1.58E+08 | -      | BLCAP     | BLCAP_2  | 11.7             | 33.4             |
| chr2   | 1.58E+08 | -      | BLCAP     | BLCAP_3  | 28.7             | 49.5             |
| chr10  | 49244330 | -      | GRIK2     | GRIK2_1  | 5.4              | 25               |
| chr2   | 1.58E+08 | -      | BLCAP     | BLCAP_1  | 4                | 16.6             |
| chr9   | 4456006  | -      | GRIA4     | GRIA4    | 5.7              | 14.6             |
| chr3   | 80706912 | -      | GRIA2     | GRIA2_5  | 83.7             | 87.9             |
| chr14  | 7936048  | +      | FLNB      | FLNB     | 1.6              | 5.5              |
| chr16  | 91656133 | +      | SON       | SON_2    | 0.3              | 2.3              |
| chr11  | 46272643 | -      | CYFIP2    | CYFIP2   | 0                | 1.9              |
| chr11  | 1.03E+08 | -      | C1QL1     | C1QL1    | 1.4              | 3.2              |
| chr12  | 8750269  | -      | PUM2      | PUM2     | 0.1              | 1.7              |
| chr17  | 45662949 | -      | TMEM63B   | TMEM63B  | 0.5              | 1.9              |
| chr1   | 1.72E+08 | +      | COPA      | COPA     | 3.6              | 5                |
| chrX   | 74226649 | -      | FLNA      | FLNA_1   | 0.6              | 1.7              |
| chrX   | 74226862 | -      | FLNA      | FLNA_2   | 0.9              | 1.9              |
| chr15  | 38491612 | -      | AZIN1     | AZIN1_1  | 0                | 0.3              |
| chr16  | 91655615 | +      | SON       | SON_1    | 0.1              | 0.3              |
| chr14  | 12411582 | -      | CADPS     | CADPS    | 0                | 0                |
| chr17  | 27502795 | -      | GRM4      | GRM4     | 0                | 0                |
| chr14  | 30066121 | -      | CACNA1D   | CACNA1D  | 0                | 0                |
| chr12  | 46700334 | -      | NOVA1     | NOVA1    | 0                | 0                |
| chr10  | 49272789 | -      | GRIK2     | GRIK2_3  | 0                | 0                |
| chr6   | 1.27E+08 | -      | KCNA1     | KCNA1    | 0                | 0                |
| chr15  | 38491613 | -      | AZIN1     | AZIN1_2  | 0.1              | 0                |
| chrX   | 72445292 | -      | GABRA3    | GABRA3   | 1.1              | 0                |
| chrX   | 41654252 | +      | GRIA3     | GRIA3    | 20               | 14               |
| chr3   | 80706908 | -      | GRIA2     | GRIA2_4  | 6                | 0                |
| chr3   | 80706650 | -      | GRIA2     | GRIA2_3  | 14.3             | 7.7              |
| chr10  | 49272776 | -      | GRIK2     | GRIK2_2  | 6.8              | 0                |
| chr5   | 77407783 | -      | IGFBP7    | IGFBP7_2 | 18.9             | 10               |

# Statistical analysis of pre-pulse inhibition in polyI:C treated offspring experiment

## Contents

|                                            |          |
|--------------------------------------------|----------|
| Set data file name and read data           | 1        |
| Check the number of mice in each group     | 1        |
| Visualize the mice responses to exposure   | 2        |
| ANOVA table                                | 3        |
| <b>Female-only analysis</b>                | <b>4</b> |
| ANOVA table . . . . .                      | 4        |
| Female-specific effect estimates . . . . . | 4        |
| <b>Male-only analysis</b>                  | <b>4</b> |
| ANOVA table . . . . .                      | 4        |
| Male-specific effect estimates . . . . .   | 5        |

## Set data file name and read data

```
data_file_name <- "PPI_response_dataset.csv"
dat <- read.csv(data_file_name)
```

## Check the number of mice in each group

and whether all mice were assessed at all levels:

```
table(dat[,c("level", "treatment", "sex")])
```

```
## , , sex = female
##
##      treatment
## level control treatment
## PPI_69      8         7
## PPI_73      8         7
## PPI_77      8         7
## PPI_81      8         7
##
## , , sex = male
##
##      treatment
## level control treatment
## PPI_69      5         7
## PPI_73      5         7
```

```
## PPI_77      5      7
## PPI_81      5      7
```

## Visualize the mice responses to exposure

```
dat <- data.table(dat) ## working with data.table is easier
setkeyv(dat, c("treatment", "subj"))
dat$level <- factor(dat$level, levels = unique(dat$level))
p <- ggplot(data=dat, aes(x=level, y=response, group = subj, color = treatment)) +
  geom_bar(aes(x=level, y=response, fill = treatment), stat = "identity", position= "dodge")+
  xlab("Noise level") +
  ylab("Response value")
p + facet_wrap(~sex, ncol = 1)
```

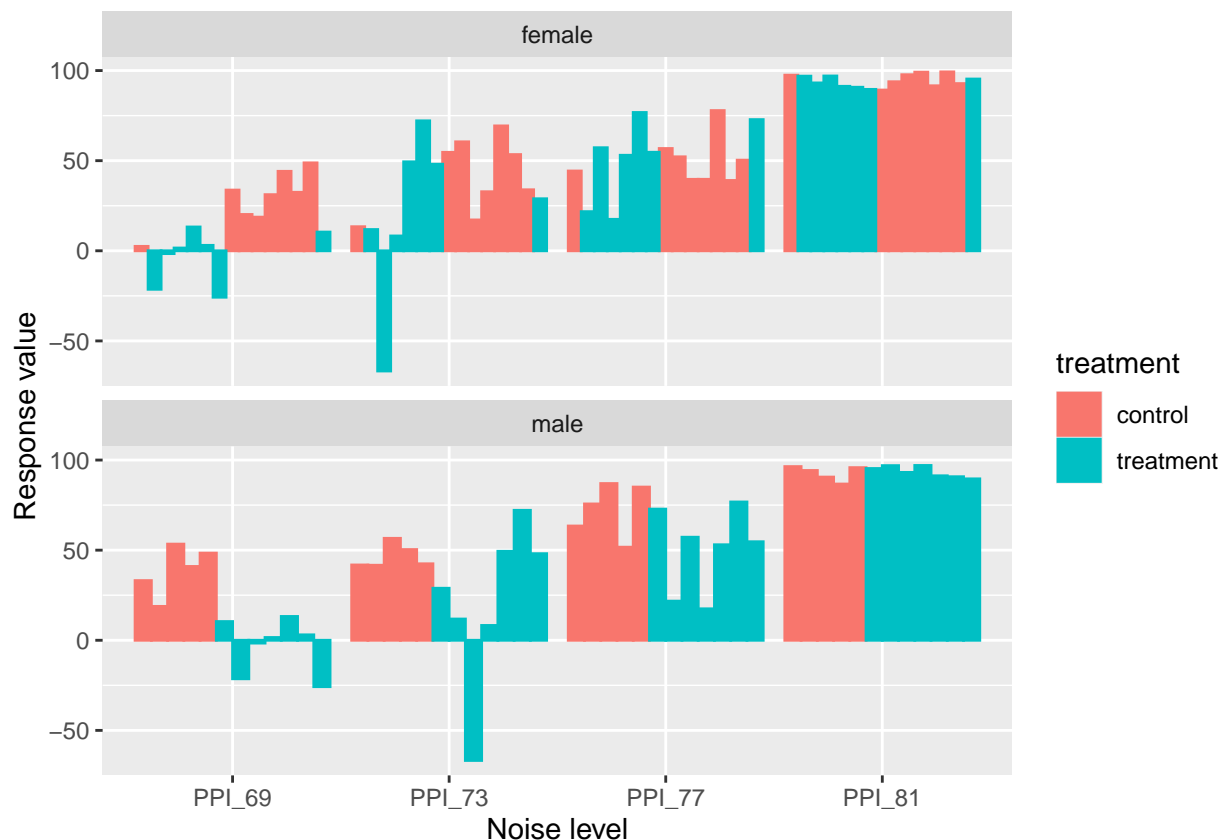

Average across mice in the treatment groups.  
Adding bars based on SEs of percent inhibition.

```
dat[,mean_response := mean(response, na.rm = TRUE), by = c("level", "treatment")]
dat[,low_bar := mean(response, na.rm = TRUE) -
  sd(response, na.rm = TRUE)/sqrt(sum(!is.na(response))), by = c("level", "treatment")]
dat[,high_bar := mean(response, na.rm = TRUE) +
  sd(response, na.rm = TRUE)/sqrt(sum(!is.na(response))), by = c("level", "treatment")]
### movement averaged across treatment groups:
p <- ggplot(data=dat, aes(x=level, y=mean_response, group=treatment, color = treatment)) +
  geom_bar(aes(x=level, y=mean_response, fill = treatment), stat = "identity", position= "dodge")+
  geom_errorbar(aes(x = level, ymin = low_bar, ymax = high_bar), position = "dodge", size = 0.5) +
  xlab("Noise level") +
```

```
ylab("Average response (by treatment group)")
p + facet_wrap(~sex, ncol = 1)
```

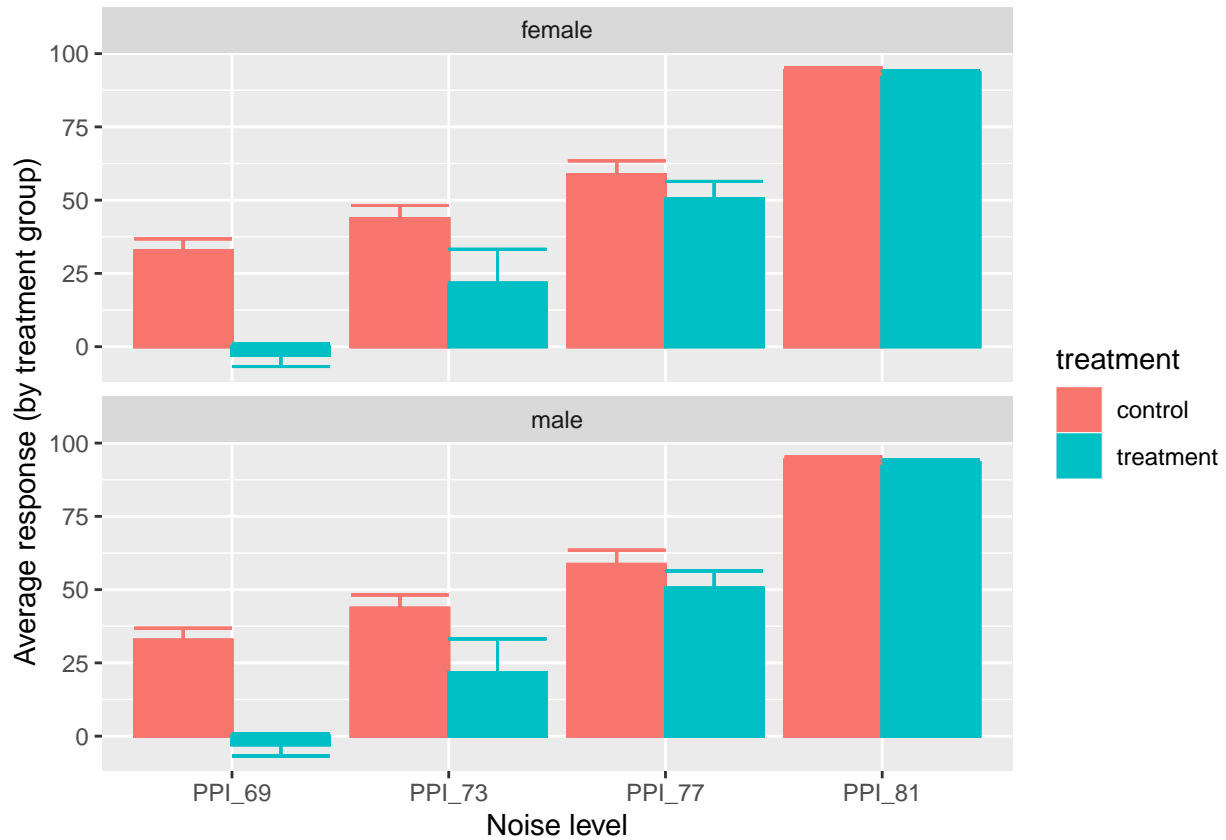

Statistical analysis We use mixed models, with random effect per mouse. The outcome is called “response” in the data, predictors are treatment vs control, exposure level, sex, and all possible interactions. #

## ANOVA table

Generating an ANOVA table for the full model:

```
mod_treat <- lmer(response ~ as.factor(sex)*as.factor(level)*as.factor(treatment) +
                  (1 | subj), dat)
anova_table <- round(anova(mod_treat),4)
rownames(anova_table) <- sub("as.factor(level)", "level", rownames(anova_table),
                             fixed = TRUE)
rownames(anova_table) <- sub("as.factor(sex)", "sex", rownames(anova_table),
                             fixed = TRUE)
rownames(anova_table) <- sub("as.factor(treatment)", "treatment", rownames(anova_table),
                             fixed = TRUE)
anova_table
```

```
## Type III Analysis of Variance Table with Satterthwaite's method
##              Sum Sq Mean Sq NumDF DenDF F value Pr(>F)
## sex                324   323.9     1    23  0.8222 0.3739
## level             89631 29877.1     3    69 75.8453 <2e-16 ***
## treatment          5303  5302.6     1    23 13.4609 0.0013 **
## sex:level           546   181.9     3    69  0.4618 0.7099
```

```
## sex:treatment      324   323.9    1   23  0.8222 0.3739
## level:treatment   4809  1603.1    3   69  4.0697 0.0101 *
## sex:level:treatment  546   181.9    3   69  0.4618 0.7099
## ---
## Signif. codes:  0 '***' 0.001 '**' 0.01 '*' 0.05 '.' 0.1 ' ' 1
```

There is no evidence of sex effect.

## Female-only analysis

### ANOVA table

ANOVA table for the full model:

```
mod_treat <- lmer(response ~ as.factor(level)*as.factor(treatment) + (1 | subj),
                  dat[sex == "female"])
anova_table <- round(anova(mod_treat),4)
rownames(anova_table) <- sub("as.factor(level)", "level", rownames(anova_table),
                           fixed = TRUE)
rownames(anova_table) <- sub("as.factor(treatment)", "treatment", rownames(anova_table),
                           fixed = TRUE)
anova_table
```

```
## Type III Analysis of Variance Table with Satterthwaite's method
##              Sum Sq Mean Sq NumDF DenDF F value Pr(>F)
## level          54226  18075.4     3    39 48.2678 <2e-16 ***
## treatment       1620   1620.5     1    13  4.3273 0.0579 .
## level:treatment  2682    894.0     3    39  2.3872 0.0837 .
## ---
## Signif. codes:  0 '***' 0.001 '**' 0.01 '*' 0.05 '.' 0.1 ' ' 1
```

### Female-specific effect estimates

```
effects <- summary(mod_treat)$coef
rownames(effects) <- sub("as.factor(level)", "", rownames(effects), fixed = TRUE)
rownames(effects) <- sub("as.factor(treatment)", "", rownames(effects), fixed = TRUE)
round(effects,4)
```

```
##              Estimate Std. Error    df t value Pr(>|t|)
## (Intercept)   28.9154    7.3586 49.2844  3.9295  0.0003
## PPI_73        12.9265    9.6758 39.0000  1.3360  0.1893
## PPI_77        21.0174    9.6758 39.0000  2.1722  0.0360
## PPI_81        66.1730    9.6758 39.0000  6.8390  0.0000
## treatment    -31.8481   10.7718 49.2844 -2.9566  0.0048
## PPI_73:treatment 11.6700   14.1639 39.0000  0.8239  0.4150
## PPI_77:treatment 32.4084   14.1639 39.0000  2.2881  0.0276
## PPI_81:treatment 30.1635   14.1639 39.0000  2.1296  0.0396
```

## Male-only analysis

### ANOVA table

ANOVA table for the full model:

```

mod_treat <- lmer(response ~ as.factor(level)*as.factor(treatment) + (1 | subj),
                  dat[sex == "male"])
anova_table <- round(anova(mod_treat),4)
rownames(anova_table) <- sub("as.factor(level)", "level", rownames(anova_table),
                             fixed = TRUE)
rownames(anova_table) <- sub("as.factor(treatment)", "treatment", rownames(anova_table),
                             fixed = TRUE)
anova_table

```

```

## Type III Analysis of Variance Table with Satterthwaite's method
##              Sum Sq Mean Sq NumDF DenDF F value Pr(>F)
## level          37950 12649.9     3    30 30.1767 <2e-16 ***
## treatment       3934   3933.8     1    10  9.3841 0.0120 *
## level:treatment  2674    891.4     3    30  2.1265 0.1177
## ---
## Signif. codes:  0 '***' 0.001 '**' 0.01 '*' 0.05 '.' 0.1 ' ' 1

```

## Male-specific effect estimates

```

effects <- summary(mod_treat)$coef
rownames(effects) <- sub("as.factor(level)", "", rownames(effects), fixed = TRUE)
rownames(effects) <- sub("as.factor(treatment)", "", rownames(effects), fixed = TRUE)
round(effects,4)

```

```

##              Estimate Std. Error    df t value Pr(>|t|)
## (Intercept)    38.9062     9.6435 38.869  4.0344  0.0002
## PPI_73          7.6330    12.9491 30.000  0.5895  0.5600
## PPI_77         33.6145    12.9491 30.000  2.5959  0.0145
## PPI_81         53.8035    12.9491 30.000  4.1550  0.0002
## treatment     -41.8388    12.6264 38.869 -3.3136  0.0020
## PPI_73:treatment 16.9635    16.9543 30.000  1.0005  0.3250
## PPI_77:treatment 19.8113    16.9543 30.000  1.1685  0.2518
## PPI_81:treatment 42.5330    16.9543 30.000  2.5087  0.0178

```

# Statistical analysis amphetamine induced activity experiment

## Contents

|                                                        |   |
|--------------------------------------------------------|---|
| Read the data                                          | 1 |
| Make sure we have the right numbers of mice per group: | 1 |
| Visualize the data                                     | 1 |
| Statistical analysis                                   | 4 |
| Mixed model with mouse-specific intercept . . . . .    | 4 |
| ANOVA table                                            | 4 |
| Time intervals-specific effects                        | 5 |
| Male-only analysis                                     | 5 |
| Female-only analysis                                   | 6 |

## Read the data

```
data_file_name <- "amphetamine_data.csv"
dat <- read.csv(data_file_name)
```

## Make sure we have the right numbers of mice per group:

```
table(dat[which(dat$time == 1),c("sex", "status")])
```

```
##           status
## sex      control treatment
## female         8         7
## male          5         7
```

## Visualize the data

First, we look at the distance moved in each 5 minute block by each of the mice.

```
dat <- data.table(dat) ## working with data.table is easier
dat[,sex_status := paste0(sex, "_", status)]

### figure of all individual mice movement in time:
p <- ggplot(data=dat, aes(x=time, y=move, group=subj, color = sex_status)) +
  geom_line()+
  geom_point() +
  xlab("Number of 5 minute block") +
```

```
ylab("Distance moved in time block")
p + facet_wrap(~sex, ncol = 1)
```

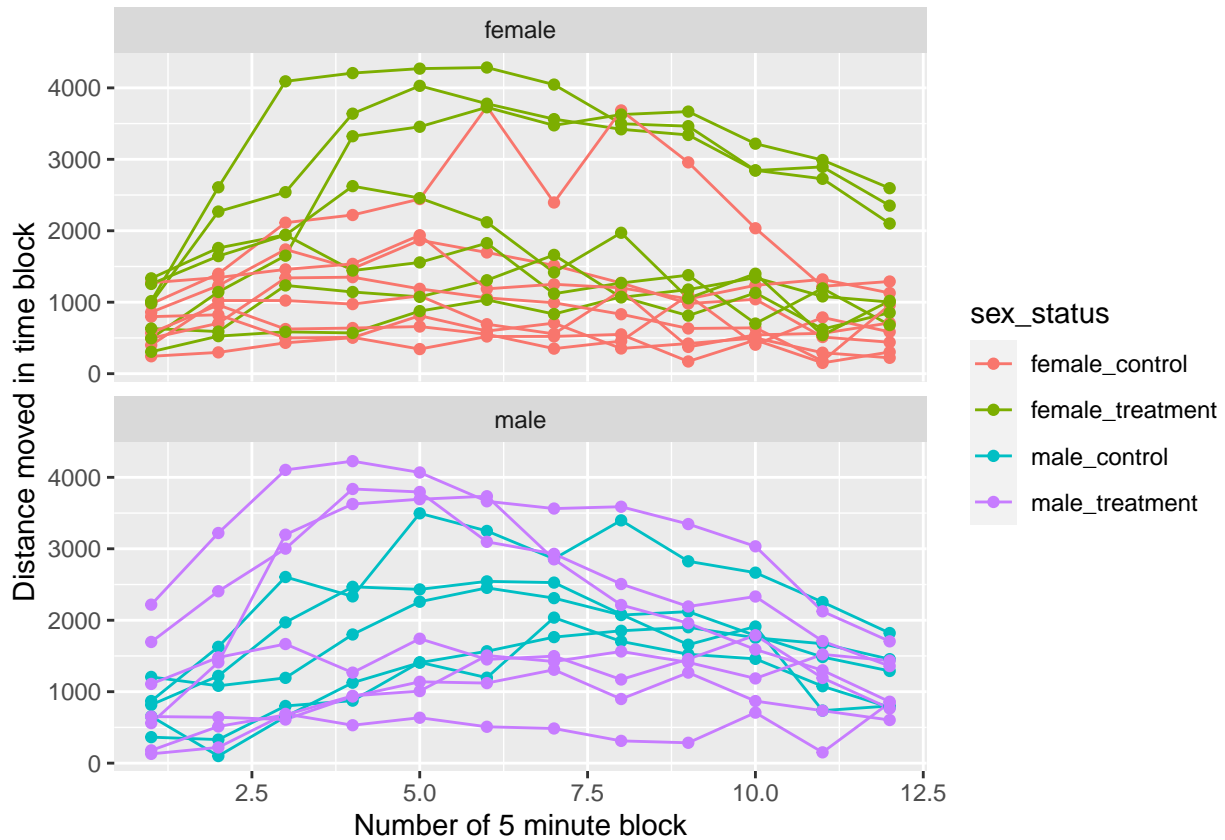

Second, we look at the distance moved in each 5 minute block, averaged across mice in the treatment and control groups. We add error bars around the mean movement in the groups. Length of the bars is 2 times the standard errors of the movement computed over the mice in the group, at the given time point.

```
### movement averaged across groups treatment only:
dat[,mean_move_time := mean(move), by = c("time", "status")]
dat[,low_bar := mean(move) - sd(move)/sqrt(length(move)), by = c("time", "status")]
dat[,high_bar := mean(move) + sd(move)/sqrt(length(move)), by = c("time", "status")]
p <- ggplot(data=dat, aes(x=time, y=mean_move_time, group=status, color = status)) +
  geom_line()+
  geom_point() +
  geom_errorbar(aes(x = time, ymin = low_bar, ymax = high_bar)) +
  xlab("Number of 5 minute block") +
  ylab("Average distance (in treatment group) moved in time block")
p
```



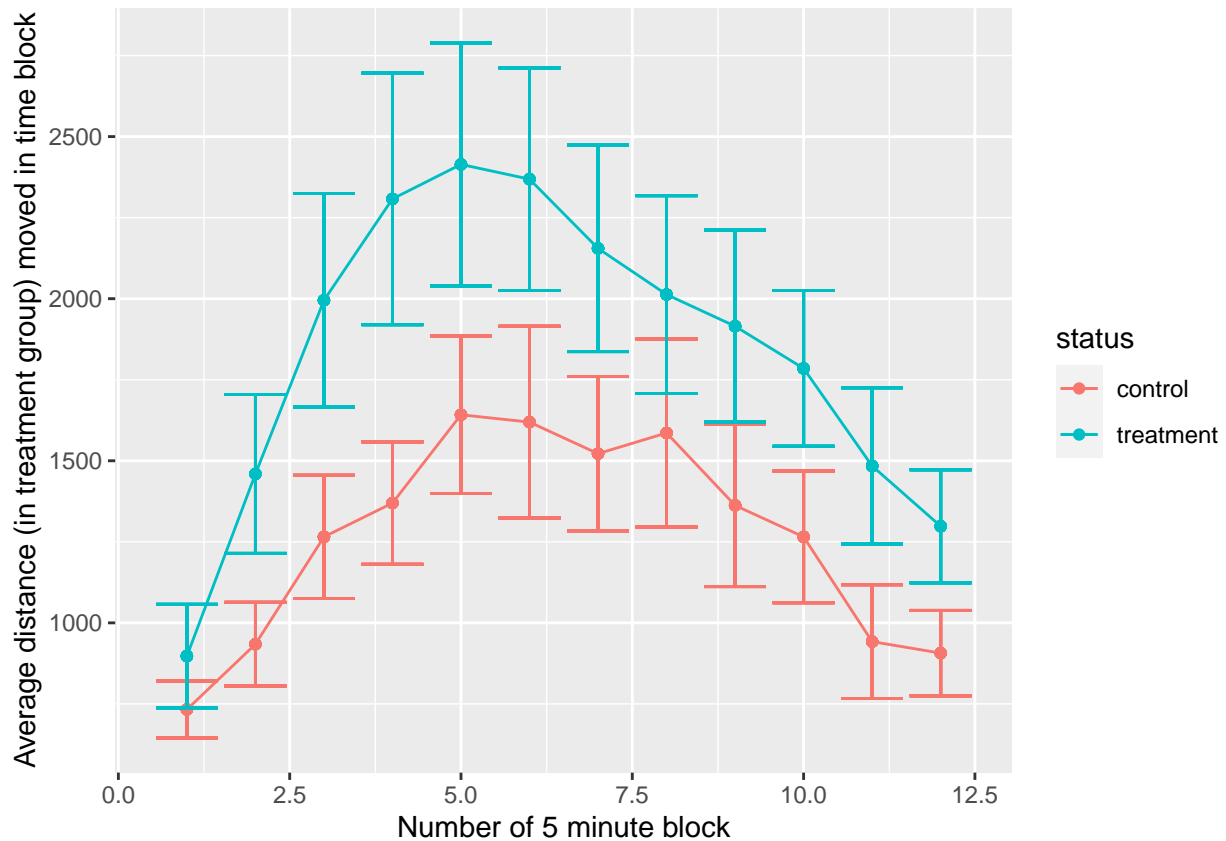

A similar figure, Astratified by sex:

```

dat[,mean_move_time := mean(move), by = c("time", "status", "sex")]
dat[,low_bar := mean(move) - sd(move)/sqrt(length(move)), by = c("time", "status", "sex")]
dat[,high_bar := mean(move) + sd(move)/sqrt(length(move)), by = c("time", "status", "sex")]
### movement averaged across groups defined by sex and treatment:
p <- ggplot(data=dat, aes(x=time, y=mean_move_time, group=sex_status, color = sex_status)) +
  geom_line()+
  geom_point() +
  geom_errorbar(aes(x = time, ymin = low_bar, ymax = high_bar)) +
  xlab("Number of 5 minute block") +
  ylab("Average distance (in sex/treatment group) moved in time block")
p + facet_wrap(~sex, ncol = 1)

```

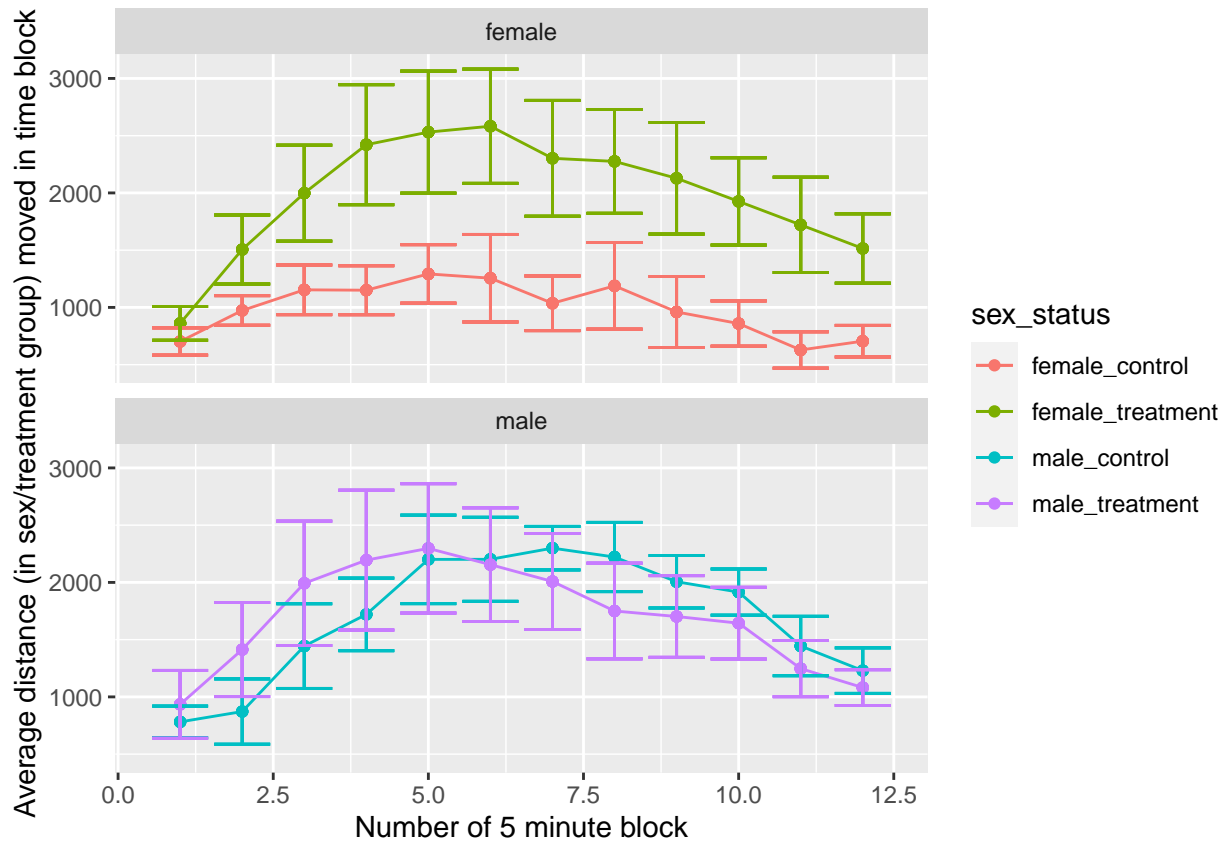

## Statistical analysis

First, we explain the rationale for the model, then provide the code and results.

### Mixed model with mouse-specific intercept

We have 12 repeated measures for each of the mice (average distance moved in 5 minutes). We will assume that each mice have an individual effect, which can be interpreted as a mouse-specific average distance moved in every 5 minutes block. This is modelled in a mixed model with mouse-specific intercept, under the standard assumption that these random effects come from a normal distribution. This modeling assumption is made in the code using the (1|subj) of the model statement seen later.

In the following code, we fit a baseline model, without treatment effect, and then a model with treatment effect. We then compare the two models using the anova command.

### ANOVA table

```
dat[,treated := as.numeric(status == "treatment")]
dat[,male := as.numeric(sex == "male")]
mod_treat <- lmer(move ~ treated*male + (1 | subj), dat)
anova(mod_treat)
```

```
## Type III Analysis of Variance Table with Satterthwaite's method
##              Sum Sq Mean Sq NumDF DenDF F value Pr(>F)
## treated      2008819 2008819     1    23  5.3813 0.02958 *
## male          836425  836425     1    23  2.2406 0.14802
```

```
## treated:male 868755 868755 1 23 2.3273 0.14076
## ---
## Signif. codes: 0 '***' 0.001 '**' 0.01 '*' 0.05 '.' 0.1 ' ' 1
```

and the effect estimates:

```
round(summary(mod_treat)$coeff, 3)
```

```
##           Estimate Std. Error df t value Pr(>|t|)
## (Intercept)  992.072    291.099 23   3.408   0.002
## treated      988.511    426.126 23   2.320   0.030
## male         702.610    469.384 23   1.497   0.148
## treated:male -981.583    643.436 23  -1.526   0.141
```

## Time intervals-specific effects

There is some interest in estimating the effect in each time intervals in the first hour. Therefore, we will create a factor with levels for each of the 12 5-minutes time intervals and repeat the analysis.

```
dat[,time_interval := paste0("interval_", time) ]
dat$time_interval <- factor(dat$time_interval, levels = c(paste0("interval_", 1:12)))
mod_treat <- lmer(move ~ male*treated*time_interval + (1 | subj), dat)
anova(mod_treat)
```

```
## Type III Analysis of Variance Table with Satterthwaite's method
##           Sum Sq Mean Sq NumDF DenDF F value
## male           486378  486378     1    23  2.2406
## treated       1168121 1168121     1    23  5.3813
## time_interval  4551221  413747    11   253  1.9060
## male:treated   505178  505178     1    23  2.3272
## male:time_interval 6261767 569252    11   253  2.6224
## treated:time_interval 5013758 455796    11   253  2.0998
## male:treated:time_interval 6132500 557500    11   253  2.5683
##           Pr(>F)
## male           0.148023
## treated        0.029584 *
## time_interval  0.038969 *
## male:treated   0.140761
## male:time_interval 0.003478 **
## treated:time_interval 0.020829 *
## male:treated:time_interval 0.004208 **
## ---
## Signif. codes: 0 '***' 0.001 '**' 0.01 '*' 0.05 '.' 0.1 ' ' 1
```

## Male-only analysis

```
dat[,time_interval := paste0("interval_", time) ]
dat$time_interval <- factor(dat$time_interval, levels = c(paste0("interval_", 1:12)))
mod_treat <- lmer(move ~ treated*time_interval + (1 | subj), dat[sex == "male"])
anova(mod_treat)
```

```
## Type III Analysis of Variance Table with Satterthwaite's method
##           Sum Sq Mean Sq NumDF DenDF F value Pr(>F)
## treated           41         41     1    10  0.0002  0.98913
## time_interval 15776546 1434231    11   110  6.7849 1.318e-08
```

```
## treated:time_interval 4043723 367611 11 110 1.7391 0.07398
##
## treated
## time_interval ***
## treated:time_interval .
## ---
## Signif. codes: 0 '***' 0.001 '**' 0.01 '*' 0.05 '.' 0.1 ' ' 1
```

## Female-only analysis

```
dat[,time_interval := paste0("interval_", time) ]
dat$time_interval <- factor(dat$time_interval, levels = c(paste0("interval_", 1:12)))
mod_treat <- lmer(move ~ treated*time_interval + (1 | subj), dat[sex == "female"])
anova(mod_treat)
```

```
## Type III Analysis of Variance Table with Satterthwaite's method
##              Sum Sq Mean Sq NumDF DenDF F value Pr(>F)
## treated          1247533 1247533     1    13  5.6336 0.03371 *
## time_interval    4551221  413747    11   143  1.8684 0.04821 *
## treated:time_interval 5013758  455796    11   143  2.0583 0.02709 *
## ---
## Signif. codes: 0 '***' 0.001 '**' 0.01 '*' 0.05 '.' 0.1 ' ' 1
```

# Statistical analysis of habituation period

## Contents

|                                                        |   |
|--------------------------------------------------------|---|
| Read the data                                          | 1 |
| Make sure we have the right numbers of mice per group: | 1 |
| Visualize the data                                     | 1 |
| Mixed model with mouse-specific intercept              | 4 |
| Check if there is a significant treatment effect       | 4 |
| ANOVA table                                            | 5 |

## Read the data

```
data_file_name <- "habituation_30_min.csv"
dat <- read.csv(data_file_name)
```

## Make sure we have the right numbers of mice per group:

```
table(dat[which(dat$time == 1),c("sex", "status")])
```

```
##           status
## sex      control treatment
## female         8         7
## male           5         7
```

## Visualize the data

First, we look at the distance moved in each 5 minute block by each of the mice.

```
dat <- data.table(dat) ## working with data.table is easier
dat[,sex_status := paste0(sex, "_", status)]

### figure of all individual mice movement in time:
p <- ggplot(data=dat, aes(x=time, y=move, group=subj, color = sex_status)) +
  geom_line()+
  geom_point() +
  xlab("Number of 5 minute block") +
  ylab("Distance moved in time block")
p + facet_wrap(~sex, ncol = 1)
```

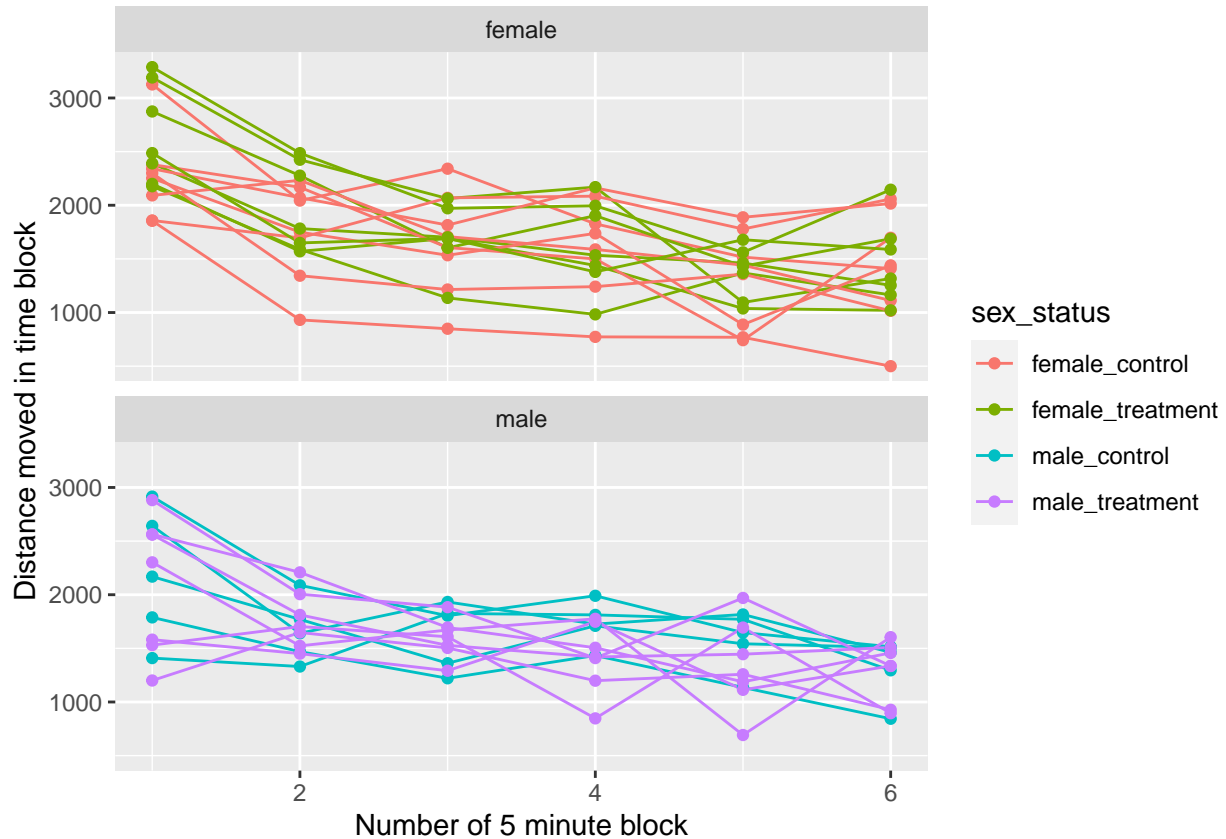

Second, we look at the distance moved in each 5 minute block, averaged across mice in each of the treatment group. We now add bars around the mean movement in the groups. The length of the bars is 2 standard errors of the movement computed over the mice in the group.

```
### movement averaged across groups treatment only:
dat[,mean_move_time := mean(move), by = c("time", "status")]
dat[,low_bar := mean(move) - sd(move)/sqrt(length(move)), by = c("time", "status")]
dat[,high_bar := mean(move) + sd(move)/sqrt(length(move)), by = c("time", "status")]
p <- ggplot(data=dat, aes(x=time, y=mean_move_time, group=status, color = status)) +
  geom_line()+
  geom_point() +
  geom_errorbar(aes(x = time, ymin = low_bar, ymax = high_bar)) +
  xlab("Number of 5 minute block") +
  ylab("Average distance (in treatment group) moved in time block")
p
```

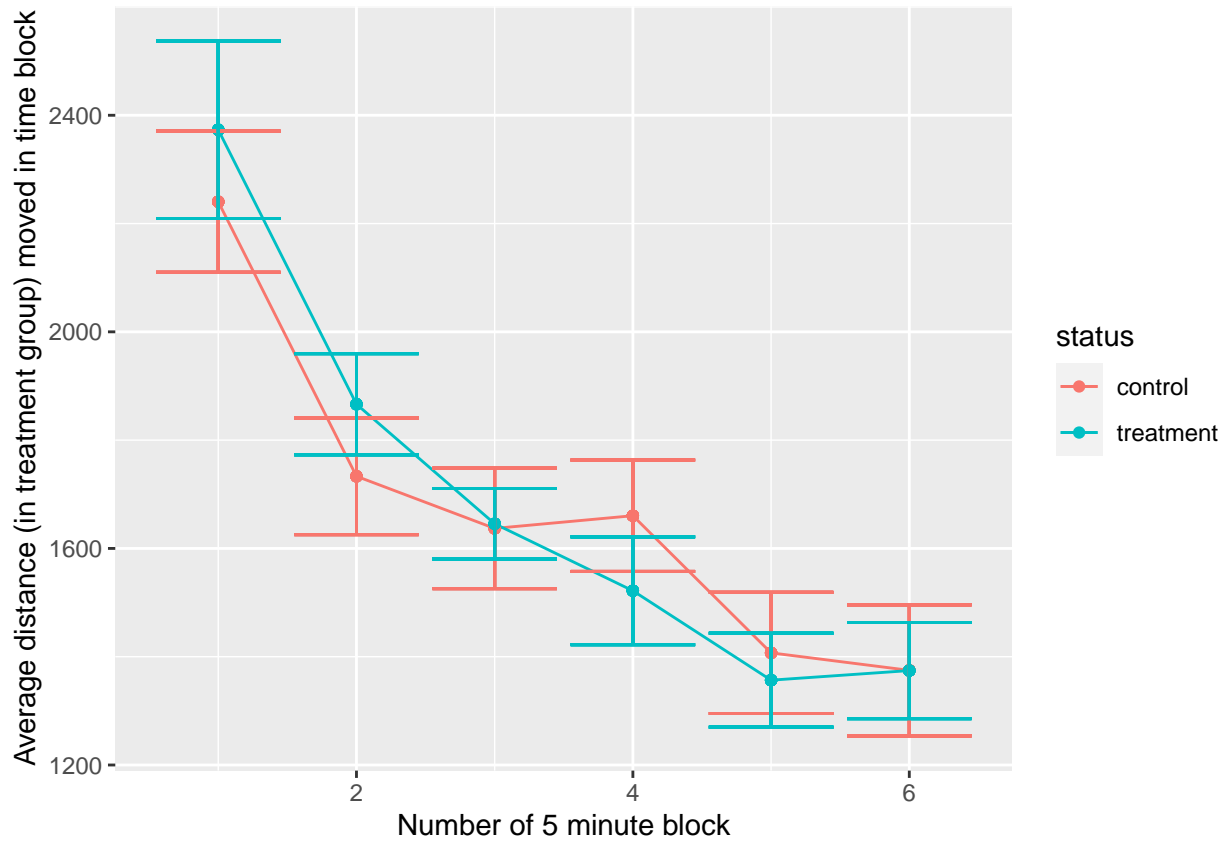

And stratified by sex:

```
dat[,mean_move_time := mean(move), by = c("time", "status", "sex")]
dat[,low_bar := mean(move) - sd(move)/sqrt(length(move)), by = c("time", "status", "sex")]
dat[,high_bar := mean(move) + sd(move)/sqrt(length(move)), by = c("time", "status", "sex")]
### movement averaged across groups defined by sex and treatment:
p <- ggplot(data=dat, aes(x=time, y=mean_move_time, group=sex_status, color = sex_status)) +
  geom_line()+
  geom_point() +
  geom_errorbar(aes(x = time, ymin = low_bar, ymax = high_bar)) +
  xlab("Number of 5 minute block") +
  ylab("Average distance (in sex/treatment group) moved in time block")
p + facet_wrap(~sex, ncol = 1)
```

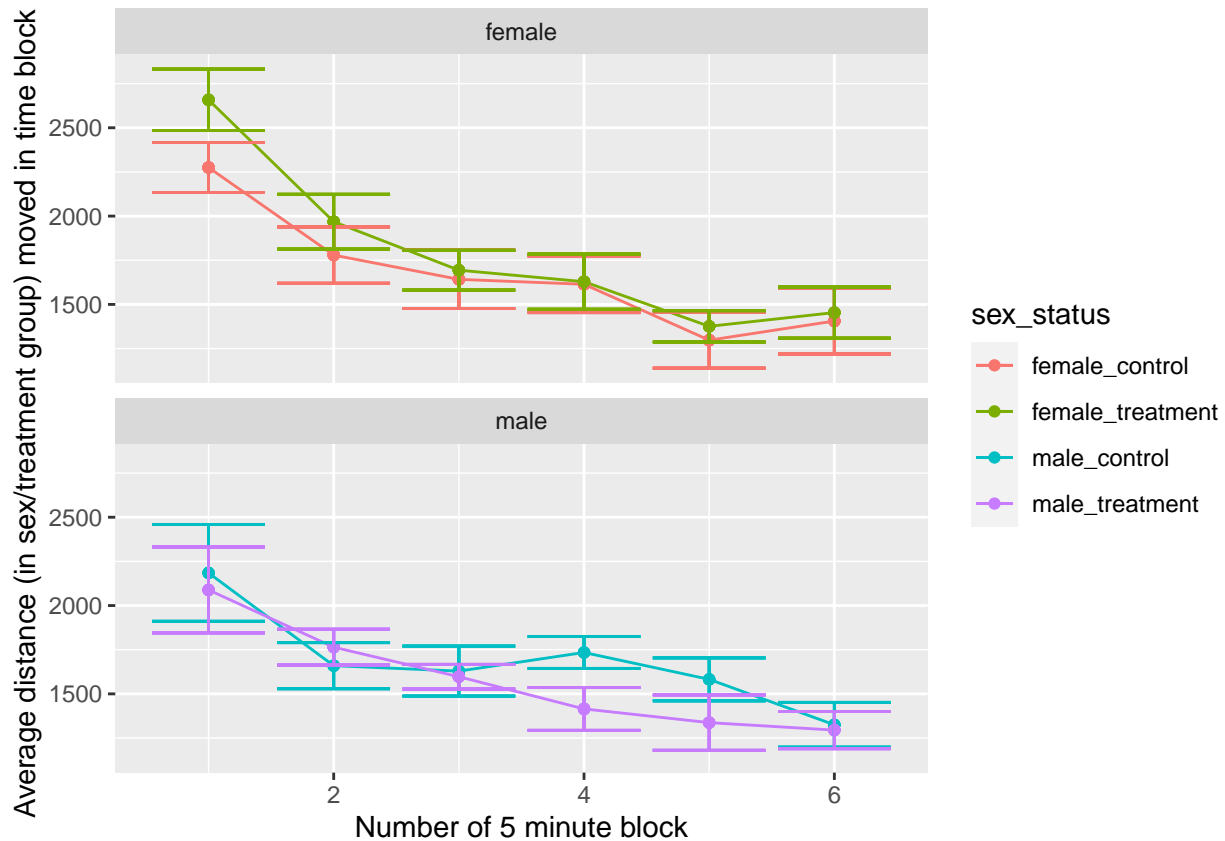

## Mixed model with mouse-specific intercept

We have 6 repeated measures for each of the mice (average distance moved in 5 minutes). We assume that each mice have an individual effect, which can be interpreted as a mouse-specific average distance moved in every 5 minutes block. This is modeled in a mixed model with mouse-specific intercept, under the standard assumption that these random effects come from a normal distribution. This modeling assumption is made in the code using the  $(1|subj)$  of the model statement seen later.

In the following code, we fit a baseline model, without treatment effect, and then a model with treatment effect in the first hour. We then compare the two models using the anova command.

## Check if there is a significant treatment effect

We do this by comparing a model with treatment effect (and treatment-sex interaction), to a model without

```
dat[,treated := as.numeric(status == "treatment")]
dat[,male := as.numeric(sex == "male")]
dat[,time_interval := paste0("interval_", time) ]
dat$time_interval <- factor(dat$time_interval, levels = c(paste0("interval_", 1:6)))
mod_treat <- lmer(move ~ treated*male*time_interval + (1 | subj), dat)
mod_notreat <- lmer(move ~ male*time_interval + (1 | subj), dat)
anova(mod_treat, mod_notreat)
```

```
## refitting model(s) with ML (instead of REML)
```

```
## Data: dat
```

```
## Models:
```



```
## mod_notreat: move ~ male * time_interval + (1 | subj)
## mod_treat: move ~ treated * male * time_interval + (1 | subj)
##           npar   AIC   BIC logLik deviance Chisq Df Pr(>Chisq)
## mod_notreat  14 2359.9 2403.2 -1166.0  2331.9
## mod_treat    26 2373.2 2453.5 -1160.6  2321.2 10.742 12    0.5511
```

There is no evidence for treatment effect (the model that includes a treatment effect does not have a better fit compared to a model that does not model a treatment effect).

## ANOVA table

```
anova(mod_treat)
```

```
## Type III Analysis of Variance Table with Satterthwaite's method
##           Sum Sq Mean Sq NumDF DenDF F value
## treated           56253   56253     1    23  0.6690
## male              814     814     1    23  0.0097
## time_interval    4723327  944665     5   115 11.2347
## treated:male      80632   80632     1    23  0.9589
## treated:time_interval 359355  71871     5   115  0.8547
## male:time_interval 378316  75663     5   115  0.8998
## treated:male:time_interval 241536  48307     5   115  0.5745
##           Pr(>F)
## treated           0.4218
## male              0.9225
## time_interval    7.836e-09 ***
## treated:male      0.3376
## treated:time_interval 0.5139
## male:time_interval 0.4838
## treated:male:time_interval 0.7194
## ---
## Signif. codes:  0 '***' 0.001 '**' 0.01 '*' 0.05 '.' 0.1 ' ' 1
```

# Statistical analysis of saline induced activity

## Contents

|                                                        |   |
|--------------------------------------------------------|---|
| Read the data                                          | 1 |
| Make sure we have the right numbers of mice per group: | 1 |
| Visualize the data                                     | 1 |
| Mixed model with mouse-specific intercept              | 4 |
| ANOVA table                                            | 4 |
| Time intervals-specific effects                        | 5 |

## Read the data

```
data_file_name <- "saline_30_min.csv"  
dat <- read.csv(data_file_name)
```

## Make sure we have the right numbers of mice per group:

```
table(dat[which(dat$time == 1),c("sex", "status")])
```

```
##           status  
## sex      control treatment  
## female         8         7  
## male           5         7
```

## Visualize the data

First, we look at the distance moved in each 5 minute block by each of the mice.

```
dat <- data.table(dat) ## working with data.table is easier  
dat[,sex_status := paste0(sex, "_", status)]  
  
### figure of all individual mice movement in time:  
p <- ggplot(data=dat, aes(x=time, y=move, group=subj, color = sex_status)) +  
  geom_line()+  
  geom_point() +  
  xlab("Number of 5 minute block") +  
  ylab("Distance moved in time block")  
p + facet_wrap(~sex, ncol = 1)
```

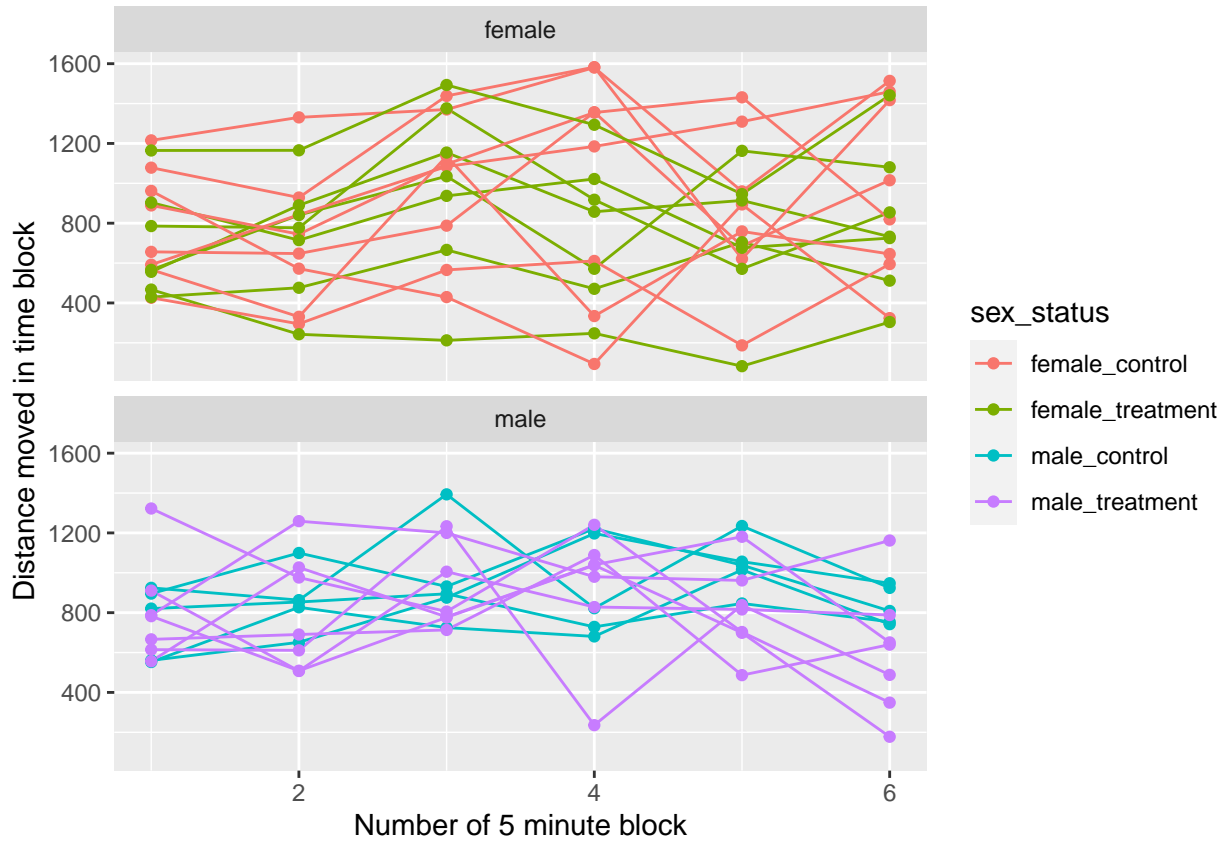

We now visualize the data by averaging across the treatment groups. We look at the distance moved in each 5 minute block, averaged across mice in the groups. We add error bars centered at each mean. The length of a bar is 2 times the standard errors of the mean, computed over the mice in the group at that time point.

```
dat[,mean_move_time := mean(move), by = c("time", "status")]
dat[,low_bar := mean(move) - sd(move)/sqrt(length(move)), by = c("time", "status")]
dat[,high_bar := mean(move) + sd(move)/sqrt(length(move)), by = c("time", "status")]
p <- ggplot(data=dat, aes(x=time, y=mean_move_time, group=status, color = status)) +
  geom_line()+
  geom_point() +
  geom_errorbar(aes(x = time, ymin = low_bar, ymax = high_bar)) +
  xlab("Number of 5 minute block") +
  ylab("Average distance (in treatment group) moved in time block")
```

p

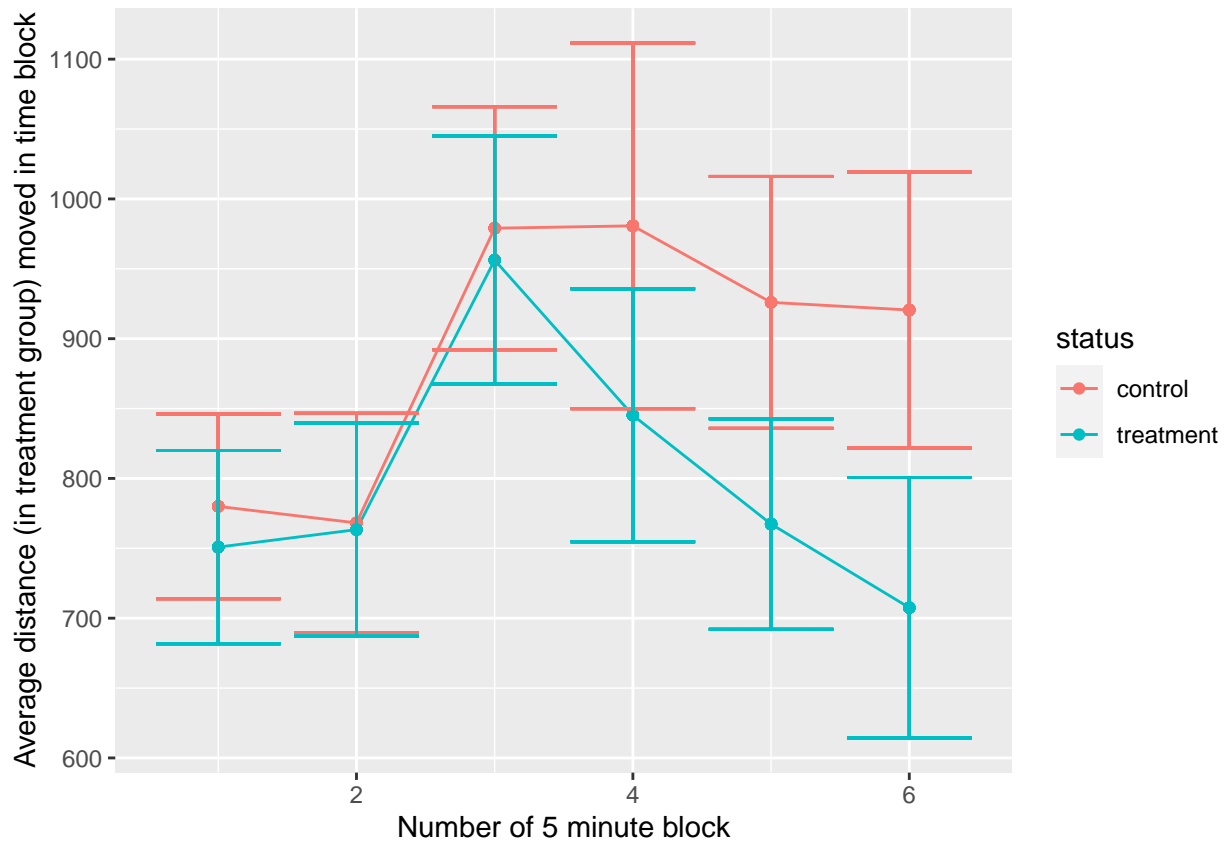

And sex stratified:

```

dat[,mean_move_time := mean(move), by = c("time", "status", "sex")]
dat[,low_bar := mean(move) - sd(move)/sqrt(length(move)), by = c("time", "status", "sex")]
dat[,high_bar := mean(move) + sd(move)/sqrt(length(move)), by = c("time", "status", "sex")]
### movement averaged across groups defined by sex and treatment:
p <- ggplot(data=dat, aes(x=time, y=mean_move_time, group=sex_status, color = sex_status)) +
  geom_line()+
  geom_point() +
  geom_errorbar(aes(x = time, ymin = low_bar, ymax = high_bar)) +
  xlab("Number of 5 minute block") +
  ylab("Average distance (in sex/treatment group) moved in time block")
p + facet_wrap(~sex, ncol = 1)

```

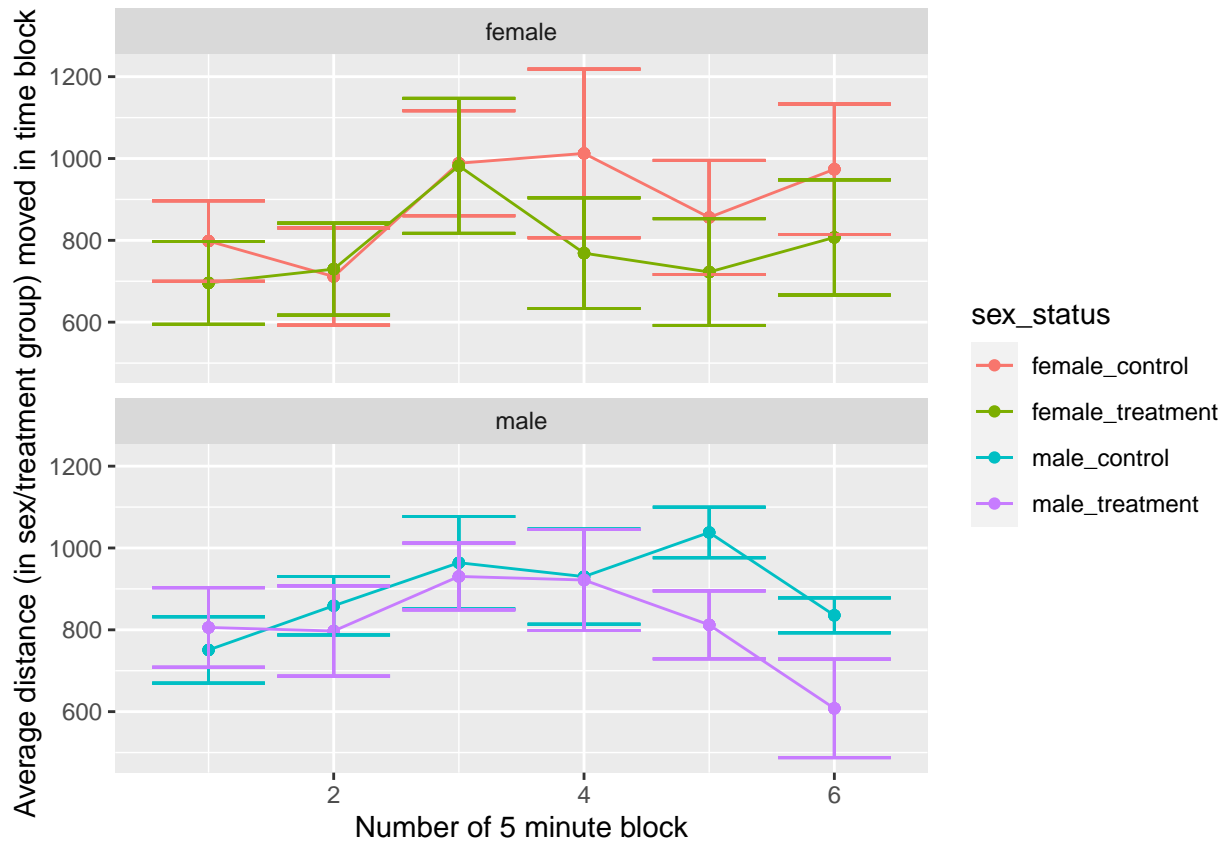

## Mixed model with mouse-specific intercept

We have 6 repeated measures for each of the mice (each representing the average distance moved in 5 minutes). We assume that each mice have an individual effect, which can be interpreted as a mouse-specific average distance moved in every 5 minutes block. This is modeled in a mixed model with mouse-specific intercept, under the standard assumption that these random effects come from a normal distribution. This modeling assumption is made in the code using the (1|subj) of the model statement seen later.

In the following code, we fit a baseline model, without treatment effect, and then a model with treatment effect in the first hour. We then compare the two models using the anova command.

## ANOVA table

```
dat[,treated := as.numeric(status == "treatment")]
dat[,male := as.numeric(sex == "male")]
mod_treat <- lmer(move ~ treated*male + (1 | subj), dat)
anova(mod_treat)
```

```
## Type III Analysis of Variance Table with Satterthwaite's method
##              Sum Sq Mean Sq NumDF DenDF F value Pr(>F)
## treated      38647   38647     1    23  0.6507 0.4281
## male          106     106     1    23  0.0018 0.9667
## treated:male   739     739     1    23  0.0124 0.9122
```

and the effect estimates:

```
summary(mod_treat)$coeff
```

```
##           Estimate Std. Error df      t value      Pr(>|t|)
## (Intercept)  890.065850   89.53582 23  9.94089080 8.548413e-10
## treated      -105.725369  131.06703 23 -0.80665116 4.281303e-01
## male         6.085117   144.37218 23  0.04214882 9.667438e-01
## treated:male  22.072045   197.90687 23  0.11152743 9.121657e-01
```

This suggest no treatment effect. There is potentially effect that we will see if we account for different movement by time, motivating the following model.

## Time intervals-specific effects

Here, we account for potential differences in movement overtime, and potential treatmnet effect that varies by time as well. We create a factor variables with levels for each of the 12 5-minutes time intervals, and repeat the analysis above.

```
dat[,time_interval := paste0("interval_", time) ]
dat$time_interval <- factor(dat$time_interval, levels = c(paste0("interval_", 1:12)))
mod_treat <- lmer(move ~ male*treated*time_interval + (1 | subj), dat)
anova(mod_treat)
```

```
## Type III Analysis of Variance Table with Satterthwaite's method
##           Sum Sq Mean Sq NumDF DenDF F value Pr(>F)
## male           98      98      1     23  0.0018 0.96674
## treated       35736   35736     1     23  0.6507 0.42813
## time_interval 584941  116988     5    115  2.1301 0.06673
## male:treated    683     683     1     23  0.0124 0.91217
## male:time_interval 256533  51307     5    115  0.9342 0.46166
## treated:time_interval 181921  36384     5    115  0.6625 0.65263
## male:treated:time_interval 158120  31624     5    115  0.5758 0.71841
##
## male
## treated
## time_interval
## male:treated
## male:time_interval
## treated:time_interval
## male:treated:time_interval
## ---
## Signif. codes:  0 '***' 0.001 '**' 0.01 '*' 0.05 '.' 0.1 ' ' 1
```

There is no evidence of differences by treatment group.
